# Supplementary material for: Antioxidant Activities of Alkyl Substituted Pyrazine Derivatives of Chalcones—In Vitro and In Silico Study
Source: PubMed Central journal article supplement (PMC6523444; doi:10.3390/antiox8040090), 2019-04-05
Supplement: antioxidants-08-00090-s001.pdf [file antioxidants-08-00090-s001.pdf]

# Supplementary Materials

## Antioxidant Activities of Alkyl Substituted Pyrazine Derivatives of Chalcones – In Vitro and In Silico Study

Višnja Stepanić <sup>1,\*</sup>, Mario Matijašić <sup>2</sup>, Tea Horvat <sup>1</sup>, Donatella Verbanac <sup>2,3</sup>, Marta Kučerová-Chlupáčová <sup>4</sup>, Luciano Saso <sup>5</sup> and Neven Žarković <sup>1,\*</sup>

<sup>1</sup> Division of Molecular Medicine, Ruđer Bošković Institute, Bijenička cesta 54, HR-10000 Zagreb, Croatia; Tea.Horvat@irb.hr (T.H.)

<sup>2</sup> Department for Intercellular Communication, Centre for Translational and Clinical Research and Croatian Centre of Excellence for Reproductive and Regenerative Medicine, School of Medicine, University of Zagreb, Šalata 2, HR-10000 Zagreb, Croatia; mario.matijasic@mef.hr (M.M.)

<sup>3</sup> Department of Medical Biochemistry and Haematology, Faculty of Pharmacy and Biochemistry, University of Zagreb, Domagojeva 2, HR-10000 Zagreb, Croatia; dverbanac@pharma.hr (D.V.)

<sup>4</sup> Department of Pharmaceutical Chemistry and Pharmaceutical Analysis, Faculty of Pharmacy, Charles University, Heyrovského 1203, 500 05 Hradec Králové, Czech Republic; kucerom@faf.cuni.cz

<sup>5</sup> Department of Physiology and Pharmacology Vittorio Erspamer, Sapienza University, P.le Aldo Moro 5, 00185 Rome, Italy; luciano.saso@uniroma1.it

\* Correspondence: stepanic@irb.hr (V.S.); zarkovic@irb.hr (N.Ž.); Tel.: +385-1-457-1248 (V.S.); +385-1-457-1234 (N.Ž.)

**Table S1.** SMILES, simple structural and physicochemical properties as well as toxicity risk alerts of studied compounds calculated by SwissADME and DataWarrior (DW).

| Cmpd | Canonical SMILES                                | MW     | #Heavy atoms | #Aromatic heavy atoms | Fraction Csp <sup>3</sup> | #Rotatable bonds | #H-bond acceptors | #H-bond donors | TPSA  |
|------|-------------------------------------------------|--------|--------------|-----------------------|---------------------------|------------------|-------------------|----------------|-------|
| 1    | <chem>O=C(c1cccc1)/C=C/c1cccc1O</chem>          | 224.25 | 17           | 12                    | 0                         | 3                | 2                 | 1              | 37.3  |
| 1a   | <chem>O=C(c1cncn1)/C=C/c1cccc1O</chem>          | 226.23 | 17           | 12                    | 0                         | 3                | 4                 | 1              | 63.08 |
| 1b   | <chem>CCCC1cnc(cn1)C(=O)/C=C/c1cccc1O</chem>    | 268.31 | 20           | 12                    | 0.19                      | 5                | 4                 | 1              | 63.08 |
| 1c   | <chem>O=C(c1cnc(cn1)C(C)C)/C=C/c1cccc1O</chem>  | 268.31 | 20           | 12                    | 0.19                      | 4                | 4                 | 1              | 63.08 |
| 1d   | <chem>CCCC1cnc(cn1)C(=O)/C=C/c1cccc1O</chem>    | 282.34 | 21           | 12                    | 0.24                      | 6                | 4                 | 1              | 63.08 |
| 1e   | <chem>CC(Cc1cnc(cn1)C(=O)/C=C/c1cccc1O)C</chem> | 282.34 | 21           | 12                    | 0.24                      | 5                | 4                 | 1              | 63.08 |

|    |                                                      |        |    |    |      |   |   |   |       |
|----|------------------------------------------------------|--------|----|----|------|---|---|---|-------|
| 1f | <chem>O=C(c1cnc(cn1)C(C)(C)C)/C=C/c1cccc1O</chem>    | 282.34 | 21 | 12 | 0.24 | 4 | 4 | 1 | 63.08 |
| 2  | <chem>Oc1cccc(c1)/C=C/C(=O)c1cccc1</chem>            | 224.25 | 17 | 12 | 0    | 3 | 2 | 1 | 37.3  |
| 2a | <chem>Oc1cccc(c1)/C=C/C(=O)c1cnc1</chem>             | 226.23 | 17 | 12 | 0    | 3 | 4 | 1 | 63.08 |
| 2b | <chem>CCCc1cnc(cn1)C(=O)/C=C/c1cccc(c1)O</chem>      | 268.31 | 20 | 12 | 0.19 | 5 | 4 | 1 | 63.08 |
| 2c | <chem>Oc1cccc(c1)/C=C/C(=O)c1cnc(cn1)C(C)C</chem>    | 268.31 | 20 | 12 | 0.19 | 4 | 4 | 1 | 63.08 |
| 2d | <chem>CCCCc1cnc(cn1)C(=O)/C=C/c1cccc(c1)O</chem>     | 282.34 | 21 | 12 | 0.24 | 6 | 4 | 1 | 63.08 |
| 2e | <chem>CC(Cc1cnc(cn1)C(=O)/C=C/c1cccc(c1)O)C</chem>   | 282.34 | 21 | 12 | 0.24 | 5 | 4 | 1 | 63.08 |
| 2f | <chem>Oc1cccc(c1)/C=C/C(=O)c1cnc(cn1)C(C)(C)C</chem> | 282.34 | 21 | 12 | 0.24 | 4 | 4 | 1 | 63.08 |
| 3  | <chem>Oc1ccc(cc1)/C=C/C(=O)c1cccc1</chem>            | 224.25 | 17 | 12 | 0    | 3 | 2 | 1 | 37.3  |
| 3a | <chem>Oc1ccc(cc1)/C=C/C(=O)c1cnc1</chem>             | 226.23 | 17 | 12 | 0    | 3 | 4 | 1 | 63.08 |
| 3b | <chem>CCCc1ncc(nc1)C(=O)/C=C/c1ccc(cc1)O</chem>      | 268.31 | 20 | 12 | 0.19 | 5 | 4 | 1 | 63.08 |
| 3c | <chem>Oc1ccc(cc1)/C=C/C(=O)c1cnc(cn1)C(C)C</chem>    | 268.31 | 20 | 12 | 0.19 | 4 | 4 | 1 | 63.08 |
| 3d | <chem>CCCCc1cnc(cn1)C(=O)/C=C/c1ccc(cc1)O</chem>     | 282.34 | 21 | 12 | 0.24 | 6 | 4 | 1 | 63.08 |
| 3e | <chem>CC(Cc1ncc(nc1)C(=O)/C=C/c1ccc(cc1)O)C</chem>   | 282.34 | 21 | 12 | 0.24 | 5 | 4 | 1 | 63.08 |
| 3f | <chem>Oc1ccc(cc1)/C=C/C(=O)c1cnc(cn1)C(C)(C)C</chem> | 282.34 | 21 | 12 | 0.24 | 4 | 4 | 1 | 63.08 |
| 4  | <chem>COc1cc(/C=C/C(=O)c2cccc2)ccc1O</chem>          | 254.28 | 19 | 12 | 0.06 | 4 | 3 | 1 | 46.53 |
| 4a | <chem>COc1cc(/C=C/C(=O)c2cncn2)ccc1O</chem>          | 256.26 | 19 | 12 | 0.07 | 4 | 5 | 1 | 72.31 |

|    |                                                         |        |    |    |      |   |   |   |       |
|----|---------------------------------------------------------|--------|----|----|------|---|---|---|-------|
| 4c | <chem>COc1cc(/C=C/C(=O)c2cnc(cnc2)C(C)C)ccc1O</chem>    | 298.34 | 22 | 12 | 0.24 | 5 | 5 | 1 | 72.31 |
| 4e | <chem>COc1cc(/C=C/C(=O)c2cnc(cnc2)CC(C)C)ccc1O</chem>   | 312.36 | 23 | 12 | 0.28 | 6 | 5 | 1 | 72.31 |
| 4f | <chem>COc1cc(/C=C/C(=O)c2cnc(cnc2)C(C)(C)C)ccc1O</chem> | 312.36 | 23 | 12 | 0.28 | 5 | 5 | 1 | 72.31 |

TPSA-total polar surface area

Cont.

| Cmpd | XLOGP<br>3 | WLOGP<br>P | Solubility_class      | Lipinski<br>#violations | GI<br>absorption | Bioavailability<br>Score | BBB<br>permeant | Pgp<br>substrate |
|------|------------|------------|-----------------------|-------------------------|------------------|--------------------------|-----------------|------------------|
| 1    | 3.85       | 3.18       | Moderately<br>soluble | 0                       | High             | 0.55                     | Yes             | No               |
| 1a   | 1.53       | 1.97       | Soluble               | 0                       | High             | 0.55                     | Yes             | No               |
| 1b   | 2.72       | 2.92       | Soluble               | 0                       | High             | 0.55                     | Yes             | No               |
| 1c   | 2.69       | 3.09       | Soluble               | 0                       | High             | 0.55                     | Yes             | No               |
| 1d   | 3.26       | 3.31       | Moderately<br>soluble | 0                       | High             | 0.55                     | Yes             | No               |
| 1e   | 3.16       | 3.17       | Moderately<br>soluble | 0                       | High             | 0.55                     | Yes             | No               |
| 1f   | 3.24       | 3.27       | Moderately<br>soluble | 0                       | High             | 0.55                     | Yes             | No               |
| 2    | 2.72       | 3.18       | Soluble               | 0                       | High             | 0.55                     | Yes             | No               |
| 2a   | 1.53       | 1.97       | Soluble               | 0                       | High             | 0.55                     | Yes             | No               |
| 2b   | 2.72       | 2.92       | Soluble               | 0                       | High             | 0.55                     | Yes             | No               |
| 2c   | 2.69       | 3.09       | Soluble               | 0                       | High             | 0.55                     | Yes             | No               |
| 2d   | 3.26       | 3.31       | Moderately<br>soluble | 0                       | High             | 0.55                     | Yes             | No               |
| 2e   | 3.16       | 3.17       | Moderately<br>soluble | 0                       | High             | 0.55                     | Yes             | No               |
| 2f   | 3.24       | 3.27       | Moderately<br>soluble | 0                       | High             | 0.55                     | Yes             | No               |
| 3    | 2.72       | 3.18       | Soluble               | 0                       | High             | 0.55                     | Yes             | No               |
| 3a   | 1.53       | 1.97       | Soluble               | 0                       | High             | 0.55                     | Yes             | No               |

|    |      |      |                    |   |      |      |     |    |
|----|------|------|--------------------|---|------|------|-----|----|
| 3b | 2.72 | 2.92 | Soluble            | 0 | High | 0.55 | Yes | No |
| 3c | 2.69 | 3.09 | Soluble            | 0 | High | 0.55 | Yes | No |
| 3d | 3.26 | 3.31 | Moderately soluble | 0 | High | 0.55 | Yes | No |
| 3e | 3.16 | 3.17 | Moderately soluble | 0 | High | 0.55 | Yes | No |
| 3f | 3.24 | 3.27 | Moderately soluble | 0 | High | 0.55 | Yes | No |
| 4  | 3.39 | 3.19 | Moderately soluble | 0 | High | 0.55 | Yes | No |
| 4a | 1.5  | 1.98 | Soluble            | 0 | High | 0.55 | Yes | No |
| 4c | 2.66 | 3.1  | Soluble            | 0 | High | 0.55 | Yes | No |
| 4e | 3.13 | 3.18 | Moderately soluble | 0 | High | 0.55 | Yes | No |
| 4f | 3.21 | 3.28 | Moderately soluble | 0 | High | 0.55 | Yes | No |

Bioavailability Score – Probability of F > 10% in rat, implemented from Martin Y. C. A Bioavailability Score. J. Med. Chem. 48, 3164–3170 (2005). This semi-quantitative rule-based score relying on total charge, TPSA, and violation to the Lipinski filter defines four classes of compounds with probabilities of 11%, 17%, 56% or 85%.

Cont.

| Cmpd | cLogP_DW | cLogS_DW | Druglikene<br>ss_DW | Shape<br>Index_DW | Molecular<br>Flexibility_DW | Mutagenic_<br>DW | Tumorigenic_<br>DW | Reproductive<br>Effective_DW | Irritant_DW |
|------|----------|----------|---------------------|-------------------|-----------------------------|------------------|--------------------|------------------------------|-------------|
| 1    | 2.9581   | -3.544   | 0.1336              | 0.6471            | 0.3815                      | none             | none               | none                         | none        |
| 1a   | 1.0103   | -1.978   | 0.3094              | 0.6471            | 0.2701                      | none             | none               | none                         | none        |
| 1b   | 2.2782   | -2.775   | -1.98               | 0.7               | 0.344                       | none             | none               | none                         | none        |
| 1c   | 2.2513   | -2.873   | 0.0732              | 0.65              | 0.2968                      | none             | none               | none                         | none        |
| 1d   | 2.7326   | -3.045   | -5.25               | 0.7143            | 0.3653                      | none             | none               | none                         | none        |
| 1e   | 2.4965   | -2.935   | 0.1589              | 0.6667            | 0.3703                      | none             | none               | none                         | none        |
| 1f   | 2.6462   | -3.162   | -2.846              | 0.6191            | 0.3303                      | none             | none               | none                         | none        |
| 2    | 2.9581   | -3.544   | 0.1336              | 0.6471            | 0.4231                      | none             | none               | none                         | none        |
| 2a   | 1.0103   | -1.978   | 0.3094              | 0.6471            | 0.3204                      | none             | none               | none                         | none        |
| 2b   | 2.2782   | -2.775   | -1.98               | 0.7               | 0.3807                      | none             | none               | none                         | none        |
| 2c   | 2.2513   | -2.873   | 0.0732              | 0.65              | 0.3367                      | none             | none               | none                         | none        |
| 2d   | 2.7326   | -3.045   | -5.25               | 0.7143            | 0.3983                      | none             | none               | none                         | none        |
| 2e   | 2.4965   | -2.935   | 0.1589              | 0.6667            | 0.403                       | none             | none               | none                         | none        |
| 2f   | 2.6462   | -3.162   | -2.846              | 0.6191            | 0.3657                      | none             | none               | none                         | none        |
| 3    | 2.9581   | -3.544   | 0.1336              | 0.7059            | 0.4231                      | none             | none               | none                         | none        |
| 3a   | 1.0103   | -1.978   | 0.3094              | 0.7059            | 0.3204                      | none             | none               | none                         | none        |
| 3b   | 2.2782   | -2.775   | -1.98               | 0.75              | 0.3807                      | none             | none               | none                         | none        |
| 3c   | 2.2513   | -2.873   | 0.0732              | 0.7               | 0.3367                      | none             | none               | none                         | none        |
| 3d   | 2.7326   | -3.045   | -5.25               | 0.7619            | 0.3983                      | none             | none               | none                         | none        |
| 3e   | 2.4965   | -2.935   | 0.1589              | 0.7143            | 0.403                       | none             | none               | none                         | none        |
| 3f   | 2.6462   | -3.162   | -2.846              | 0.6667            | 0.3657                      | none             | none               | none                         | none        |
| 4    | 2.8881   | -3.562   | 0.219               | 0.6316            | 0.4056                      | none             | none               | none                         | none        |
| 4a   | 0.9403   | -1.996   | 0.3928              | 0.6316            | 0.3144                      | none             | none               | none                         | none        |
| 4c   | 2.1813   | -2.891   | 0.216               | 0.6364            | 0.3328                      | none             | none               | none                         | none        |
| 4e   | 2.4265   | -2.953   | 0.3105              | 0.6522            | 0.3932                      | none             | none               | none                         | none        |
| 4f   | 2.5762   | -3.18    | -2.7                | 0.6087            | 0.3593                      | none             | none               | none                         | none        |

Drug-likeness (<http://www.openmolecules.org/propertyexplorer/druglikeness.html>): for most od drugs have this parameter is within range [-1,3]. Molecular flexibility (low < 0.5 < high) and shape index (spherical < 0.5 < linear).

## DFT EQUILIBRIUM STRUCTURES in sdf FORMAT

4

```
33 34 0 0 0 0 0 0 0 0 0 V2000
-3.5845 -0.2684 0.0115 C 0 0 0 0 0 0 0 0 0 0 0 0
-2.2379 -0.9214 -0.0446 C 0 0 0 0 0 0 0 0 0 0 0 0
-2.1524 -2.1341 -0.0774 O 0 0 0 0 0 0 0 0 0 0 0 0
-1.0394 -0.0528 -0.0840 C 0 0 0 0 0 0 0 0 0 0 0 0
0.1758 -0.6102 -0.0042 C 0 0 0 0 0 0 0 0 0 0 0 0
1.4701 0.0618 -0.0528 C 0 0 0 0 0 0 0 0 0 0 0 0
-4.6881 -1.0184 -0.3958 C 0 0 0 0 0 0 0 0 0 0 0 0
-5.9593 -0.4678 -0.3590 C 0 0 0 0 0 0 0 0 0 0 0 0
-6.1411 0.8320 0.1044 C 0 0 0 0 0 0 0 0 0 0 0 0
-5.0493 1.5775 0.5303 C 0 0 0 0 0 0 0 0 0 0 0 0
-3.7723 1.0325 0.4767 C 0 0 0 0 0 0 0 0 0 0 0 0
1.6139 1.4380 -0.2295 C 0 0 0 0 0 0 0 0 0 0 0 0
2.8710 2.0213 -0.2683 C 0 0 0 0 0 0 0 0 0 0 0 0
4.0049 1.2374 -0.1323 C 0 0 0 0 0 0 0 0 0 0 0 0
5.2321 1.8031 -0.1715 O 0 0 0 0 0 0 0 0 0 0 0 0
3.8770 -0.1468 0.0432 C 0 0 0 0 0 0 0 0 0 0 0 0
5.0684 -0.8042 0.1598 O 0 0 0 0 0 0 0 0 0 0 0 0
5.0259 -2.2163 0.3095 C 0 0 0 0 0 0 0 0 0 0 0 0
2.6236 -0.7267 0.0823 C 0 0 0 0 0 0 0 0 0 0 0 0
-1.1732 1.0116 -0.2045 H 0 0 0 0 0 0 0 0 0 0 0 0
0.1989 -1.6897 0.1073 H 0 0 0 0 0 0 0 0 0 0 0 0
-4.5233 -2.0303 -0.7377 H 0 0 0 0 0 0 0 0 0 0 0 0
-6.8099 -1.0494 -0.6869 H 0 0 0 0 0 0 0 0 0 0 0 0
-7.1336 1.2601 0.1382 H 0 0 0 0 0 0 0 0 0 0 0 0
-5.1908 2.5818 0.9048 H 0 0 0 0 0 0 0 0 0 0 0 0
-2.9326 1.6164 0.8259 H 0 0 0 0 0 0 0 0 0 0 0 0
0.7419 2.0656 -0.3416 H 0 0 0 0 0 0 0 0 0 0 0 0
2.9963 3.0857 -0.4067 H 0 0 0 0 0 0 0 0 0 0 0 0
```

5.8864 1.1025 -0.0700 H 0 0 0 0 0 0 0 0 0 0 0 0  
6.0584 -2.5429 0.3738 H 0 0 0 0 0 0 0 0 0 0 0 0  
4.5453 -2.6777 -0.5542 H 0 0 0 0 0 0 0 0 0 0 0 0  
4.4954 -2.4884 1.2229 H 0 0 0 0 0 0 0 0 0 0 0 0  
2.5140 -1.7932 0.2169 H 0 0 0 0 0 0 0 0 0 0 0 0

1 2 1 0 0 0 0  
1 7 4 0 0 0 0  
1 11 4 0 0 0 0  
2 3 2 0 0 0 0  
2 4 1 0 0 0 0  
4 5 2 0 0 0 0  
4 20 1 0 0 0 0  
5 6 1 0 0 0 0  
5 21 1 0 0 0 0  
6 12 4 0 0 0 0  
6 19 4 0 0 0 0  
7 8 4 0 0 0 0  
7 22 1 0 0 0 0  
8 9 4 0 0 0 0  
8 23 1 0 0 0 0  
9 10 4 0 0 0 0  
9 24 1 0 0 0 0  
10 11 4 0 0 0 0  
10 25 1 0 0 0 0  
11 26 1 0 0 0 0  
12 13 4 0 0 0 0  
12 27 1 0 0 0 0  
13 14 4 0 0 0 0  
13 28 1 0 0 0 0  
14 15 1 0 0 0 0  
14 16 4 0 0 0 0  
15 29 1 0 0 0 0  
16 17 1 0 0 0 0  
16 19 4 0 0 0 0





-7.1295 1.3161 -0.2359 H 0 0 0 0 0 0 0 0 0 0 0 0  
-5.2132 2.6821 0.5304 H 0 0 0 0 0 0 0 0 0 0 0 0  
-2.9718 1.6806 0.7056 H 0 0 0 0 0 0 0 0 0 0 0 0  
0.7581 1.9573 -0.3075 H 0 0 0 0 0 0 0 0 0 0 0 0  
3.0048 2.9407 -0.4070 H 0 0 0 0 0 0 0 0 0 0 0 0  
6.6489 -1.8758 -0.3179 H 0 0 0 0 0 0 0 0 0 0 0 0  
6.2424 -0.2290 -0.8784 H 0 0 0 0 0 0 0 0 0 0 0 0  
5.3293 -1.6413 -1.4924 H 0 0 0 0 0 0 0 0 0 0 0 0  
2.5237 -1.8945 0.4884 H 0 0 0 0 0 0 0 0 0 0 0 0

1 2 1 0 0 0 0  
1 7 4 0 0 0 0  
1 11 4 0 0 0 0  
2 3 2 0 0 0 0  
2 4 1 0 0 0 0  
4 5 2 0 0 0 0  
4 20 1 0 0 0 0  
5 6 1 0 0 0 0  
5 21 1 0 0 0 0  
6 12 4 0 0 0 0  
6 19 4 0 0 0 0  
7 8 4 0 0 0 0  
7 22 1 0 0 0 0  
8 9 4 0 0 0 0  
8 23 1 0 0 0 0  
9 10 4 0 0 0 0  
9 24 1 0 0 0 0  
10 11 4 0 0 0 0  
10 25 1 0 0 0 0  
11 26 1 0 0 0 0  
12 13 4 0 0 0 0  
12 27 1 0 0 0 0  
13 14 4 0 0 0 0  
13 28 1 0 0 0 0  
14 15 1 0 0 0 0

14 16 4 0 0 0 0  
16 17 1 0 0 0 0  
16 19 4 0 0 0 0  
17 18 1 0 0 0 0  
18 29 1 0 0 0 0  
18 30 1 0 0 0 0  
18 31 1 0 0 0 0  
19 32 1 0 0 0 0

M END

\$\$\$\$

4\_NR

32 33 0 0 0 0 0 0 0 0 V2000

-3.6205 -0.2632 0.0125 C 0 0 0 0 0 0 0 0 0 0 0 0  
-2.3012 -0.9638 -0.0417 C 0 0 0 0 0 0 0 0 0 0 0 0  
-2.2499 -2.1778 -0.0563 O 0 0 0 0 0 0 0 0 0 0 0 0  
-1.0665 -0.1427 -0.1013 C 0 0 0 0 0 0 0 0 0 0 0 0  
0.1303 -0.7465 0.0044 C 0 0 0 0 0 0 0 0 0 0 0 0  
1.4289 -0.1122 -0.0542 C 0 0 0 0 0 0 0 0 0 0 0 0  
-4.7569 -0.9915 -0.3415 C 0 0 0 0 0 0 0 0 0 0 0 0  
-6.0078 -0.3977 -0.2980 C 0 0 0 0 0 0 0 0 0 0 0 0  
-6.1360 0.9245 0.1177 C 0 0 0 0 0 0 0 0 0 0 0 0  
-5.0111 1.6499 0.4885 C 0 0 0 0 0 0 0 0 0 0 0 0  
-3.7544 1.0608 0.4296 C 0 0 0 0 0 0 0 0 0 0 0 0  
1.5905 1.2906 -0.2874 C 0 0 0 0 0 0 0 0 0 0 0 0  
2.8240 1.8437 -0.3304 C 0 0 0 0 0 0 0 0 0 0 0 0  
4.0348 1.0615 -0.1456 C 0 0 0 0 0 0 0 0 0 0 0 0  
5.1541 1.5874 -0.1816 O 0 0 0 0 0 0 0 0 0 0 0 0  
3.8420 -0.3750 0.0839 C 0 0 0 0 0 0 0 0 0 0 0 0  
4.8368 -1.2393 0.2687 O 0 0 0 0 0 0 0 0 0 0 0 0  
6.2266 -0.8694 0.2308 C 0 0 0 0 0 0 0 0 0 0 0 0  
2.5605 -0.9046 0.1223 C 0 0 0 0 0 0 0 0 0 0 0 0  
-1.1586 0.9215 -0.2540 H 0 0 0 0 0 0 0 0 0 0 0 0

0.1204 -1.8211 0.1507 H 0 0 0 0 0 0 0 0 0 0 0 0  
-4.6336 -2.0208 -0.6470 H 0 0 0 0 0 0 0 0 0 0 0 0  
-6.8843 -0.9626 -0.5835 H 0 0 0 0 0 0 0 0 0 0 0 0  
-7.1129 1.3868 0.1560 H 0 0 0 0 0 0 0 0 0 0 0 0  
-5.1114 2.6725 0.8247 H 0 0 0 0 0 0 0 0 0 0 0 0  
-2.8900 1.6310 0.7389 H 0 0 0 0 0 0 0 0 0 0 0 0  
0.7195 1.9122 -0.4352 H 0 0 0 0 0 0 0 0 0 0 0 0  
2.9761 2.8994 -0.5059 H 0 0 0 0 0 0 0 0 0 0 0 0  
6.7522 -1.8048 0.3918 H 0 0 0 0 0 0 0 0 0 0 0 0  
6.4534 -0.1550 1.0157 H 0 0 0 0 0 0 0 0 0 0 0 0  
6.4814 -0.4411 -0.7336 H 0 0 0 0 0 0 0 0 0 0 0 0  
2.4602 -1.9675 0.2963 H 0 0 0 0 0 0 0 0 0 0 0 0

1 2 1 0 0 0 0  
1 7 4 0 0 0 0  
1 11 4 0 0 0 0  
2 3 2 0 0 0 0  
2 4 1 0 0 0 0  
4 5 2 0 0 0 0  
4 20 1 0 0 0 0  
5 6 1 0 0 0 0  
5 21 1 0 0 0 0  
6 12 4 0 0 0 0  
6 19 4 0 0 0 0  
7 8 4 0 0 0 0  
7 22 1 0 0 0 0  
8 9 4 0 0 0 0  
8 23 1 0 0 0 0  
9 10 4 0 0 0 0  
9 24 1 0 0 0 0  
10 11 4 0 0 0 0  
10 25 1 0 0 0 0  
11 26 1 0 0 0 0  
12 13 4 0 0 0 0  
12 27 1 0 0 0 0



-5.0959 2.2103 0.2938 C 0 0 0 0 0 0 0 0 0 0 0 0  
-2.6231 0.7655 0.0788 C 0 0 0 0 0 0 0 0 0 0 0 0  
1.1317 -1.0460 -0.2351 H 0 0 0 0 0 0 0 0 0 0 0 0  
-0.1895 1.6965 0.0959 H 0 0 0 0 0 0 0 0 0 0 0 0  
4.5237 2.1086 -0.5413 H 0 0 0 0 0 0 0 0 0 0 0 0  
6.8182 1.1640 -0.4274 H 0 0 0 0 0 0 0 0 0 0 0 0  
7.1380 -1.2060 0.1997 H 0 0 0 0 0 0 0 0 0 0 0 0  
5.1875 -2.6303 0.7105 H 0 0 0 0 0 0 0 0 0 0 0 0  
2.9247 -1.7129 0.5864 H 0 0 0 0 0 0 0 0 0 0 0 0  
-0.7134 -2.0639 -0.3008 H 0 0 0 0 0 0 0 0 0 0 0 0  
-2.9489 -3.1146 -0.3485 H 0 0 0 0 0 0 0 0 0 0 0 0  
-5.8496 -1.1354 -0.0386 H 0 0 0 0 0 0 0 0 0 0 0 0  
-6.1486 2.4584 0.3435 H 0 0 0 0 0 0 0 0 0 0 0 0  
-4.6349 2.6811 -0.5724 H 0 0 0 0 0 0 0 0 0 0 0 0  
-4.5941 2.4976 1.2158 H 0 0 0 0 0 0 0 0 0 0 0 0  
-2.5130 1.8335 0.1944 H 0 0 0 0 0 0 0 0 0 0 0 0  
1 2 1 0 0 0 0  
1 7 4 0 0 0 0  
1 11 4 0 0 0 0  
2 3 2 0 0 0 0  
2 4 1 0 0 0 0  
4 5 2 0 0 0 0  
4 20 1 0 0 0 0  
5 6 1 0 0 0 0  
5 21 1 0 0 0 0  
6 12 4 0 0 0 0  
6 19 4 0 0 0 0  
7 8 4 0 0 0 0  
7 22 1 0 0 0 0  
8 9 4 0 0 0 0  
8 23 1 0 0 0 0  
9 10 4 0 0 0 0  
9 24 1 0 0 0 0  
10 11 4 0 0 0 0



-2.8253 -2.0315 0.0000 C 0 0 0 0 0 0 0 0 0 0 0 0  
-3.9671 -1.2467 0.0001 C 0 0 0 0 0 0 0 0 0 0 0 0  
-5.1887 -1.8243 0.0002 O 0 0 0 0 0 0 0 0 0 0 0 0  
-3.8531 0.1502 0.0002 C 0 0 0 0 0 0 0 0 0 0 0 0  
-5.0518 0.8045 0.0002 O 0 0 0 0 0 0 0 0 0 0 0 0  
-5.0240 2.2249 -0.0005 C 0 0 0 0 0 0 0 0 0 0 0 0  
-2.6051 0.7423 0.0002 C 0 0 0 0 0 0 0 0 0 0 0 0  
1.2233 -1.0000 -0.0003 H 0 0 0 0 0 0 0 0 0 0 0 0  
-0.1826 1.7170 0.0003 H 0 0 0 0 0 0 0 0 0 0 0 0  
4.9216 -2.6972 -0.0006 H 0 0 0 0 0 0 0 0 0 0 0 0  
6.9903 -1.2954 0.0001 H 0 0 0 0 0 0 0 0 0 0 0 0  
4.6710 2.1134 0.0004 H 0 0 0 0 0 0 0 0 0 0 0 0  
-0.6932 -2.0630 -0.0000 H 0 0 0 0 0 0 0 0 0 0 0 0  
-2.9410 -3.1059 -0.0000 H 0 0 0 0 0 0 0 0 0 0 0 0  
-5.8504 -1.1236 -0.0001 H 0 0 0 0 0 0 0 0 0 0 0 0  
-6.0604 2.5457 -0.0007 H 0 0 0 0 0 0 0 0 0 0 0 0  
-4.5220 2.5970 -0.8946 H 0 0 0 0 0 0 0 0 0 0 0 0  
-4.5222 2.5979 0.8933 H 0 0 0 0 0 0 0 0 0 0 0 0  
-2.5052 1.8183 0.0002 H 0 0 0 0 0 0 0 0 0 0 0 0  
1 2 1 0 0 0 0  
1 7 4 0 0 0 0  
1 11 4 0 0 0 0  
2 3 2 0 0 0 0  
2 4 1 0 0 0 0  
4 5 2 0 0 0 0  
4 20 1 0 0 0 0  
5 6 1 0 0 0 0  
5 21 1 0 0 0 0  
6 12 4 0 0 0 0  
6 19 4 0 0 0 0  
7 8 4 0 0 0 0  
8 9 4 0 0 0 0  
8 22 1 0 0 0 0  
9 10 4 0 0 0 0

9 23 1 0 0 0 0  
10 11 4 0 0 0 0  
11 24 1 0 0 0 0  
12 13 4 0 0 0 0  
12 25 1 0 0 0 0  
13 14 4 0 0 0 0  
13 26 1 0 0 0 0  
14 15 1 0 0 0 0  
14 16 4 0 0 0 0  
15 27 1 0 0 0 0  
16 17 1 0 0 0 0  
16 19 4 0 0 0 0  
17 18 1 0 0 0 0  
18 28 1 0 0 0 0  
18 29 1 0 0 0 0  
18 30 1 0 0 0 0  
19 31 1 0 0 0 0

M END

\$\$\$\$

4a\_A

30 31 0 0 0 0 0 0 0 0 V2000

-3.6004 -0.2261 0.0235 C 0 0 0 0 0 0 0 0 0 0 0  
-2.2615 -0.9365 -0.0366 C 0 0 0 0 0 0 0 0 0 0 0  
-2.2944 -2.1699 -0.1042 O 0 0 0 0 0 0 0 0 0 0 0  
-1.0964 -0.1141 -0.0198 C 0 0 0 0 0 0 0 0 0 0 0  
0.1493 -0.6947 -0.0895 C 0 0 0 0 0 0 0 0 0 0 0  
1.4150 -0.0739 -0.1000 C 0 0 0 0 0 0 0 0 0 0 0  
-3.6634 1.0943 0.1731 N 0 0 0 0 0 0 0 0 0 0 0  
-4.8779 1.6319 0.2174 C 0 0 0 0 0 0 0 0 0 0 0  
-6.0290 0.8649 0.1090 C 0 0 0 0 0 0 0 0 0 0 0  
-5.9812 -0.4579 -0.0439 N 0 0 0 0 0 0 0 0 0 0 0  
-4.7680 -0.9943 -0.0831 C 0 0 0 0 0 0 0 0 0 0 0



1.6037 1.3324 -0.0423 C 0 0 0 0 0 0 0 0 0 0 0 0  
2.8487 1.8886 -0.0623 C 0 0 0 0 0 0 0 0 0 0 0 0  
4.0616 1.1011 -0.1572 C 0 0 0 0 0 0 0 0 0 0 0 0  
5.1956 1.6137 -0.2108 O 0 0 0 0 0 0 0 0 0 0 0 0  
3.8416 -0.3389 -0.1918 C 0 0 0 0 0 0 0 0 0 0 0 0  
4.9244 -1.1848 -0.3175 O 0 0 0 0 0 0 0 0 0 0 0 0  
5.8288 -1.1168 0.7792 C 0 0 0 0 0 0 0 0 0 0 0 0  
2.5891 -0.8745 -0.1692 C 0 0 0 0 0 0 0 0 0 0 0 0  
-1.2355 0.9530 0.0421 H 0 0 0 0 0 0 0 0 0 0 0 0  
0.1474 -1.7800 -0.1456 H 0 0 0 0 0 0 0 0 0 0 0 0  
-4.9383 2.7065 0.3422 H 0 0 0 0 0 0 0 0 0 0 0 0  
-7.0085 1.3255 0.1459 H 0 0 0 0 0 0 0 0 0 0 0 0  
-4.6781 -2.0642 -0.2028 H 0 0 0 0 0 0 0 0 0 0 0 0  
0.7352 1.9767 0.0141 H 0 0 0 0 0 0 0 0 0 0 0 0  
2.9859 2.9619 -0.0308 H 0 0 0 0 0 0 0 0 0 0 0 0  
6.6240 -1.8292 0.5675 H 0 0 0 0 0 0 0 0 0 0 0 0  
5.3167 -1.4059 1.7021 H 0 0 0 0 0 0 0 0 0 0 0 0  
6.2362 -0.1124 0.8738 H 0 0 0 0 0 0 0 0 0 0 0 0  
2.4956 -1.9536 -0.2174 H 0 0 0 0 0 0 0 0 0 0 0 0  
1 2 1 0 0 0 0  
1 7 4 0 0 0 0  
1 11 4 0 0 0 0  
2 3 2 0 0 0 0  
2 4 1 0 0 0 0  
4 5 2 0 0 0 0  
4 20 1 0 0 0 0  
5 6 1 0 0 0 0  
5 21 1 0 0 0 0  
6 12 4 0 0 0 0  
6 19 4 0 0 0 0  
7 8 4 0 0 0 0  
8 9 4 0 0 0 0  
8 22 1 0 0 0 0  
9 10 4 0 0 0 0



-2.7799 1.8648 0.0000 C 0 0 0 0 0 0 0 0 0 0 0 0  
-3.9990 1.0726 0.0000 C 0 0 0 0 0 0 0 0 0 0 0 0  
-5.1146 1.6057 -0.0000 O 0 0 0 0 0 0 0 0 0 0 0 0  
-3.8187 -0.3847 -0.0000 C 0 0 0 0 0 0 0 0 0 0 0 0  
-4.8222 -1.2585 -0.0000 O 0 0 0 0 0 0 0 0 0 0 0 0  
-6.2091 -0.8755 -0.0000 C 0 0 0 0 0 0 0 0 0 0 0 0  
-2.5413 -0.9242 -0.0000 C 0 0 0 0 0 0 0 0 0 0 0 0  
1.2134 0.9204 0.0000 H 0 0 0 0 0 0 0 0 0 0 0 0  
-0.1044 -1.8489 0.0000 H 0 0 0 0 0 0 0 0 0 0 0 0  
4.8481 2.7478 -0.0000 H 0 0 0 0 0 0 0 0 0 0 0 0  
6.9663 1.4211 -0.0000 H 0 0 0 0 0 0 0 0 0 0 0 0  
4.7738 -2.0701 0.0000 H 0 0 0 0 0 0 0 0 0 0 0 0  
-0.6714 1.9297 0.0000 H 0 0 0 0 0 0 0 0 0 0 0 0  
-2.9230 2.9362 0.0000 H 0 0 0 0 0 0 0 0 0 0 0 0  
-6.7426 -1.8202 -0.0000 H 0 0 0 0 0 0 0 0 0 0 0 0  
-6.4449 -0.2952 -0.8865 H 0 0 0 0 0 0 0 0 0 0 0 0  
-6.4449 -0.2952 0.8864 H 0 0 0 0 0 0 0 0 0 0 0 0  
-2.4496 -2.0020 -0.0000 H 0 0 0 0 0 0 0 0 0 0 0 0  
1 2 1 0 0 0 0  
1 7 4 0 0 0 0  
1 11 4 0 0 0 0  
2 3 2 0 0 0 0  
2 4 1 0 0 0 0  
4 5 2 0 0 0 0  
4 20 1 0 0 0 0  
5 6 1 0 0 0 0  
5 21 1 0 0 0 0  
6 12 4 0 0 0 0  
6 19 4 0 0 0 0  
7 8 4 0 0 0 0  
8 9 4 0 0 0 0  
8 22 1 0 0 0 0  
9 10 4 0 0 0 0  
9 23 1 0 0 0 0









2 3 2 0 0 0 0  
2 4 1 0 0 0 0  
4 5 2 0 0 0 0  
4 24 1 0 0 0 0  
5 6 1 0 0 0 0  
5 25 1 0 0 0 0  
6 12 4 0 0 0 0  
6 19 4 0 0 0 0  
7 8 4 0 0 0 0  
8 9 4 0 0 0 0  
8 26 1 0 0 0 0  
9 10 4 0 0 0 0  
9 20 1 0 0 0 0  
10 11 4 0 0 0 0  
11 36 1 0 0 0 0  
12 13 4 0 0 0 0  
12 37 1 0 0 0 0  
13 14 4 0 0 0 0  
13 38 1 0 0 0 0  
14 15 1 0 0 0 0  
14 16 4 0 0 0 0  
15 39 1 0 0 0 0  
16 17 1 0 0 0 0  
16 19 4 0 0 0 0  
17 18 1 0 0 0 0  
18 40 1 0 0 0 0  
18 41 1 0 0 0 0  
18 42 1 0 0 0 0  
19 43 1 0 0 0 0  
20 21 1 0 0 0 0  
20 27 1 0 0 0 0  
20 35 1 0 0 0 0  
21 22 1 0 0 0 0  
21 23 1 0 0 0 0





6.0524 -1.2475 1.7081 C 0 0 0 0 0 0 0 0 0 0 0 0  
8.1254 -0.7228 0.3917 C 0 0 0 0 0 0 0 0 0 0 0 0  
-0.3205 -0.6236 -0.4095 H 0 0 0 0 0 0 0 0 0 0 0 0  
-1.9498 1.9339 0.0568 H 0 0 0 0 0 0 0 0 0 0 0 0  
3.5380 -1.9888 -0.7993 H 0 0 0 0 0 0 0 0 0 0 0 0  
5.8925 -1.5803 -1.0124 H 0 0 0 0 0 0 0 0 0 0 0 0  
6.0918 -2.3014 1.4185 H 0 0 0 0 0 0 0 0 0 0 0 0  
5.0110 -0.9882 1.8983 H 0 0 0 0 0 0 0 0 0 0 0 0  
6.6069 -1.1338 2.6408 H 0 0 0 0 0 0 0 0 0 0 0 0  
6.5747 0.6728 0.9063 H 0 0 0 0 0 0 0 0 0 0 0 0  
8.5717 -0.0880 -0.3752 H 0 0 0 0 0 0 0 0 0 0 0 0  
8.2258 -1.7633 0.0715 H 0 0 0 0 0 0 0 0 0 0 0 0  
8.6964 -0.5993 1.3132 H 0 0 0 0 0 0 0 0 0 0 0 0  
6.3723 0.0546 -1.4837 H 0 0 0 0 0 0 0 0 0 0 0 0  
2.8189 2.7134 -0.1180 H 0 0 0 0 0 0 0 0 0 0 0 0  
-2.1882 -1.8269 -0.4740 H 0 0 0 0 0 0 0 0 0 0 0 0  
-4.3374 -3.0171 -0.5306 H 0 0 0 0 0 0 0 0 0 0 0 0  
-8.3065 1.1743 1.2582 H 0 0 0 0 0 0 0 0 0 0 0 0  
-6.8569 0.7084 2.1842 H 0 0 0 0 0 0 0 0 0 0 0 0  
-7.7286 -0.5153 1.2106 H 0 0 0 0 0 0 0 0 0 0 0 0  
-4.3018 1.8735 0.1874 H 0 0 0 0 0 0 0 0 0 0 0 0  
1 2 1 0 0 0 0  
1 7 4 0 0 0 0  
1 11 4 0 0 0 0  
2 3 2 0 0 0 0  
2 4 1 0 0 0 0  
4 5 2 0 0 0 0  
4 24 1 0 0 0 0  
5 6 1 0 0 0 0  
5 25 1 0 0 0 0  
6 12 4 0 0 0 0  
6 19 4 0 0 0 0  
7 8 4 0 0 0 0  
8 9 4 0 0 0 0

8 26 1 0 0 0 0  
9 10 4 0 0 0 0  
9 20 1 0 0 0 0  
10 11 4 0 0 0 0  
11 36 1 0 0 0 0  
12 13 4 0 0 0 0  
12 37 1 0 0 0 0  
13 14 4 0 0 0 0  
13 38 1 0 0 0 0  
14 15 1 0 0 0 0  
14 16 4 0 0 0 0  
16 17 1 0 0 0 0  
16 19 4 0 0 0 0  
17 18 1 0 0 0 0  
18 39 1 0 0 0 0  
18 40 1 0 0 0 0  
18 41 1 0 0 0 0  
19 42 1 0 0 0 0  
20 21 1 0 0 0 0  
20 27 1 0 0 0 0  
20 35 1 0 0 0 0  
21 22 1 0 0 0 0  
21 23 1 0 0 0 0  
21 31 1 0 0 0 0  
22 28 1 0 0 0 0  
22 29 1 0 0 0 0  
22 30 1 0 0 0 0  
23 32 1 0 0 0 0  
23 33 1 0 0 0 0  
23 34 1 0 0 0 0

M END

\$\$\$

4e\_NR



8.1534 -1.8707 -0.1317 H 0 0 0 0 0 0 0 0 0 0 0 0  
8.6820 -0.8034 1.1706 H 0 0 0 0 0 0 0 0 0 0 0 0  
6.3366 0.1152 -1.5324 H 0 0 0 0 0 0 0 0 0 0 0 0  
2.8995 2.7858 0.0118 H 0 0 0 0 0 0 0 0 0 0 0 0  
-2.0849 -1.7574 -0.4129 H 0 0 0 0 0 0 0 0 0 0 0 0  
-4.2125 -3.0035 -0.4860 H 0 0 0 0 0 0 0 0 0 0 0 0  
-8.5048 1.2042 0.5548 H 0 0 0 0 0 0 0 0 0 0 0 0  
-7.9913 -0.4056 1.1414 H 0 0 0 0 0 0 0 0 0 0 0 0  
-8.1049 -0.1009 -0.6014 H 0 0 0 0 0 0 0 0 0 0 0 0  
-4.2648 1.8785 0.3902 H 0 0 0 0 0 0 0 0 0 0 0 0  
1 2 1 0 0 0 0  
1 7 4 0 0 0 0  
1 11 4 0 0 0 0  
2 3 2 0 0 0 0  
2 4 1 0 0 0 0  
4 5 2 0 0 0 0  
4 24 1 0 0 0 0  
5 6 1 0 0 0 0  
5 25 1 0 0 0 0  
6 12 4 0 0 0 0  
6 19 4 0 0 0 0  
7 8 4 0 0 0 0  
8 9 4 0 0 0 0  
8 26 1 0 0 0 0  
9 10 4 0 0 0 0  
9 20 1 0 0 0 0  
10 11 4 0 0 0 0  
11 36 1 0 0 0 0  
12 13 4 0 0 0 0  
12 37 1 0 0 0 0  
13 14 4 0 0 0 0  
13 38 1 0 0 0 0  
14 15 1 0 0 0 0  
14 16 4 0 0 0 0





1 2 1 0 0 0 0  
1 7 4 0 0 0 0  
1 11 4 0 0 0 0  
2 3 2 0 0 0 0  
2 4 1 0 0 0 0  
4 5 2 0 0 0 0  
4 24 1 0 0 0 0  
5 6 1 0 0 0 0  
5 25 1 0 0 0 0  
6 12 4 0 0 0 0  
6 19 4 0 0 0 0  
7 8 4 0 0 0 0  
8 9 4 0 0 0 0  
8 26 1 0 0 0 0  
9 10 4 0 0 0 0  
9 20 1 0 0 0 0  
10 11 4 0 0 0 0  
11 36 1 0 0 0 0  
12 13 4 0 0 0 0  
12 37 1 0 0 0 0  
13 14 4 0 0 0 0  
13 38 1 0 0 0 0  
14 15 1 0 0 0 0  
14 16 4 0 0 0 0  
15 39 1 0 0 0 0  
16 17 1 0 0 0 0  
16 19 4 0 0 0 0  
17 18 1 0 0 0 0  
18 40 1 0 0 0 0  
18 41 1 0 0 0 0  
18 42 1 0 0 0 0  
19 43 1 0 0 0 0  
20 21 1 0 0 0 0  
20 27 1 0 0 0 0



20 35 1 0 0 0 0  
21 22 1 0 0 0 0  
21 23 1 0 0 0 0  
21 31 1 0 0 0 0  
22 28 1 0 0 0 0  
22 29 1 0 0 0 0  
22 30 1 0 0 0 0  
23 32 1 0 0 0 0  
23 33 1 0 0 0 0  
23 34 1 0 0 0 0

M END

\$\$\$\$

4c

40 41 0 0 0 0 0 0 0 0 0 V2000  
2.3567 -0.8467 -0.0002 C 0 0 0 0 0 0 0 0 0 0 0  
0.9455 -1.3651 -0.0005 C 0 0 0 0 0 0 0 0 0 0 0  
0.7555 -2.5662 -0.0011 O 0 0 0 0 0 0 0 0 0 0 0  
-0.1369 -0.3670 -0.0001 C 0 0 0 0 0 0 0 0 0 0 0  
-1.4081 -0.7922 -0.0007 C 0 0 0 0 0 0 0 0 0 0 0  
-2.6166 0.0231 -0.0006 C 0 0 0 0 0 0 0 0 0 0 0  
2.5679 0.4696 0.0003 N 0 0 0 0 0 0 0 0 0 0 0  
3.8293 0.8672 0.0005 C 0 0 0 0 0 0 0 0 0 0 0  
4.9028 -0.0326 0.0002 C 0 0 0 0 0 0 0 0 0 0 0  
4.6839 -1.3463 -0.0003 N 0 0 0 0 0 0 0 0 0 0 0  
3.4168 -1.7487 -0.0005 C 0 0 0 0 0 0 0 0 0 0 0  
-2.5980 1.4184 -0.0010 C 0 0 0 0 0 0 0 0 0 0 0  
-3.7801 2.1425 -0.0008 C 0 0 0 0 0 0 0 0 0 0 0  
-4.9989 1.4834 -0.0002 C 0 0 0 0 0 0 0 0 0 0 0  
-6.1535 2.1863 -0.0000 O 0 0 0 0 0 0 0 0 0 0 0  
-5.0331 0.0826 0.0002 C 0 0 0 0 0 0 0 0 0 0 0  
-6.2948 -0.4413 0.0008 O 0 0 0 0 0 0 0 0 0 0 0  
-6.4173 -1.8564 0.0016 C 0 0 0 0 0 0 0 0 0 0 0

-3.8549 -0.6385 -0.0000 C 0 0 0 0 0 0 0 0 0 0 0  
6.3315 0.4485 0.0004 C 0 0 0 0 0 0 0 0 0 0 0  
6.6382 1.2603 1.2630 C 0 0 0 0 0 0 0 0 0 0 0  
6.6384 1.2608 -1.2619 C 0 0 0 0 0 0 0 0 0 0 0  
0.1457 0.6740 0.0007 H 0 0 0 0 0 0 0 0 0 0 0  
-1.5563 -1.8677 -0.0014 H 0 0 0 0 0 0 0 0 0 0 0  
4.0063 1.9356 0.0010 H 0 0 0 0 0 0 0 0 0 0 0  
6.4215 0.6851 2.1628 H 0 0 0 0 0 0 0 0 0 0 0  
6.0462 2.1768 1.2915 H 0 0 0 0 0 0 0 0 0 0 0  
7.6915 1.5420 1.2788 H 0 0 0 0 0 0 0 0 0 0 0  
6.4228 0.6857 -2.1619 H 0 0 0 0 0 0 0 0 0 0 0  
6.0457 2.1768 -1.2906 H 0 0 0 0 0 0 0 0 0 0 0  
7.6915 1.5434 -1.2767 H 0 0 0 0 0 0 0 0 0 0 0  
6.9430 -0.4537 0.0002 H 0 0 0 0 0 0 0 0 0 0 0  
3.2184 -2.8113 -0.0009 H 0 0 0 0 0 0 0 0 0 0 0  
-1.6562 1.9472 -0.0016 H 0 0 0 0 0 0 0 0 0 0 0  
-3.7806 3.2231 -0.0012 H 0 0 0 0 0 0 0 0 0 0 0  
-6.8835 1.5569 0.0005 H 0 0 0 0 0 0 0 0 0 0 0  
-7.4818 -2.0657 0.0021 H 0 0 0 0 0 0 0 0 0 0 0  
-5.9575 -2.2797 0.8955 H 0 0 0 0 0 0 0 0 0 0 0  
-5.9582 -2.2806 -0.8923 H 0 0 0 0 0 0 0 0 0 0 0  
-3.8696 -1.7189 0.0003 H 0 0 0 0 0 0 0 0 0 0 0  
1 2 1 0 0 0 0  
1 7 4 0 0 0 0  
1 11 4 0 0 0 0  
2 3 2 0 0 0 0  
2 4 1 0 0 0 0  
4 5 2 0 0 0 0  
4 23 1 0 0 0 0  
5 6 1 0 0 0 0  
5 24 1 0 0 0 0  
6 12 4 0 0 0 0  
6 19 4 0 0 0 0  
7 8 4 0 0 0 0

8 9 4 0 0 0 0  
8 25 1 0 0 0 0  
9 10 4 0 0 0 0  
9 20 1 0 0 0 0  
10 11 4 0 0 0 0  
11 33 1 0 0 0 0  
12 13 4 0 0 0 0  
12 34 1 0 0 0 0  
13 14 4 0 0 0 0  
13 35 1 0 0 0 0  
14 15 1 0 0 0 0  
14 16 4 0 0 0 0  
15 36 1 0 0 0 0  
16 17 1 0 0 0 0  
16 19 4 0 0 0 0  
17 18 1 0 0 0 0  
18 37 1 0 0 0 0  
18 38 1 0 0 0 0  
18 39 1 0 0 0 0  
19 40 1 0 0 0 0  
20 21 1 0 0 0 0  
20 22 1 0 0 0 0  
20 32 1 0 0 0 0  
21 26 1 0 0 0 0  
21 27 1 0 0 0 0  
21 28 1 0 0 0 0  
22 29 1 0 0 0 0  
22 30 1 0 0 0 0  
22 31 1 0 0 0 0

M END

\$\$\$\$

4c\_A



1.7158 1.8466 -0.0310 H 0 0 0 0 0 0 0 0 0 0 0 0  
3.8471 3.0698 -0.0454 H 0 0 0 0 0 0 0 0 0 0 0 0  
7.9689 -1.2963 0.6488 H 0 0 0 0 0 0 0 0 0 0 0 0  
6.5975 -1.0272 1.7545 H 0 0 0 0 0 0 0 0 0 0 0 0  
7.3830 0.3646 0.9477 H 0 0 0 0 0 0 0 0 0 0 0 0  
3.8948 -1.8703 -0.2084 H 0 0 0 0 0 0 0 0 0 0 0 0

1 2 1 0 0 0 0  
1 7 4 0 0 0 0  
1 11 4 0 0 0 0  
2 3 2 0 0 0 0  
2 4 1 0 0 0 0  
4 5 2 0 0 0 0  
4 23 1 0 0 0 0  
5 6 1 0 0 0 0  
5 24 1 0 0 0 0  
6 12 4 0 0 0 0  
6 19 4 0 0 0 0  
7 8 4 0 0 0 0  
8 9 4 0 0 0 0  
8 25 1 0 0 0 0  
9 10 4 0 0 0 0  
9 20 1 0 0 0 0  
10 11 4 0 0 0 0  
11 33 1 0 0 0 0  
12 13 4 0 0 0 0  
12 34 1 0 0 0 0  
13 14 4 0 0 0 0  
13 35 1 0 0 0 0  
14 15 1 0 0 0 0  
14 16 4 0 0 0 0  
16 17 1 0 0 0 0  
16 19 4 0 0 0 0  
17 18 1 0 0 0 0  
18 36 1 0 0 0 0

18 37 1 0 0 0 0  
18 38 1 0 0 0 0  
19 39 1 0 0 0 0  
20 21 1 0 0 0 0  
20 22 1 0 0 0 0  
20 32 1 0 0 0 0  
21 26 1 0 0 0 0  
21 27 1 0 0 0 0  
21 28 1 0 0 0 0  
22 29 1 0 0 0 0  
22 30 1 0 0 0 0  
22 31 1 0 0 0 0

M END

\$\$\$\$

4c\_NR

39 40 0 0 0 0 0 0 0 0 0 V2000

-2.3878 -0.8883 -0.0005 C 0 0 0 0 0 0 0 0 0 0 0 0  
-0.9988 -1.4558 -0.0006 C 0 0 0 0 0 0 0 0 0 0 0 0  
-0.8406 -2.6603 -0.0006 O 0 0 0 0 0 0 0 0 0 0 0 0  
0.1219 -0.4960 -0.0005 C 0 0 0 0 0 0 0 0 0 0 0 0  
1.3830 -0.9664 -0.0004 C 0 0 0 0 0 0 0 0 0 0 0 0  
2.5940 -0.1783 -0.0002 C 0 0 0 0 0 0 0 0 0 0 0 0  
-2.5469 0.4358 -0.0006 N 0 0 0 0 0 0 0 0 0 0 0 0  
-3.7913 0.8822 -0.0006 C 0 0 0 0 0 0 0 0 0 0 0 0  
-4.8995 0.0236 -0.0004 C 0 0 0 0 0 0 0 0 0 0 0 0  
-4.7313 -1.2973 -0.0003 N 0 0 0 0 0 0 0 0 0 0 0 0  
-3.4809 -1.7492 -0.0004 C 0 0 0 0 0 0 0 0 0 0 0 0  
2.5762 1.2532 -0.0004 C 0 0 0 0 0 0 0 0 0 0 0 0  
3.7322 1.9548 -0.0003 C 0 0 0 0 0 0 0 0 0 0 0 0  
5.0349 1.3097 0.0001 C 0 0 0 0 0 0 0 0 0 0 0 0  
6.0813 1.9690 0.0003 O 0 0 0 0 0 0 0 0 0 0 0 0  
5.0247 -0.1584 0.0003 C 0 0 0 0 0 0 0 0 0 0 0 0

6.1231 -0.9104 0.0006 O 0 0 0 0 0 0 0 0 0 0 0 0  
7.4558 -0.3689 0.0007 C 0 0 0 0 0 0 0 0 0 0 0 0  
3.8187 -0.8425 0.0001 C 0 0 0 0 0 0 0 0 0 0 0 0  
-6.3083 0.5589 0.0000 C 0 0 0 0 0 0 0 0 0 0 0 0  
-6.5842 1.3836 -1.2615 C 0 0 0 0 0 0 0 0 0 0 0 0  
-6.5843 1.3797 1.2641 C 0 0 0 0 0 0 0 0 0 0 0 0  
-0.1246 0.5536 -0.0006 H 0 0 0 0 0 0 0 0 0 0 0 0  
1.5045 -2.0444 -0.0003 H 0 0 0 0 0 0 0 0 0 0 0 0  
-3.9266 1.9565 -0.0007 H 0 0 0 0 0 0 0 0 0 0 0 0  
-6.3918 0.8013 -2.1622 H 0 0 0 0 0 0 0 0 0 0 0 0  
-5.9579 2.2769 -1.2902 H 0 0 0 0 0 0 0 0 0 0 0 0  
-7.6257 1.7055 -1.2750 H 0 0 0 0 0 0 0 0 0 0 0 0  
-6.3924 0.7944 2.1629 H 0 0 0 0 0 0 0 0 0 0 0 0  
-5.9574 2.2726 1.2957 H 0 0 0 0 0 0 0 0 0 0 0 0  
-7.6256 1.7021 1.2783 H 0 0 0 0 0 0 0 0 0 0 0 0  
-6.9537 -0.3192 -0.0013 H 0 0 0 0 0 0 0 0 0 0 0 0  
-3.3248 -2.8189 -0.0003 H 0 0 0 0 0 0 0 0 0 0 0 0  
1.6301 1.7744 -0.0007 H 0 0 0 0 0 0 0 0 0 0 0 0  
3.7499 3.0356 -0.0004 H 0 0 0 0 0 0 0 0 0 0 0 0  
8.0956 -1.2452 0.0009 H 0 0 0 0 0 0 0 0 0 0 0 0  
7.6228 0.2351 0.8870 H 0 0 0 0 0 0 0 0 0 0 0 0  
7.6231 0.2349 -0.8857 H 0 0 0 0 0 0 0 0 0 0 0 0  
3.8527 -1.9237 0.0002 H 0 0 0 0 0 0 0 0 0 0 0 0  
1 2 1 0 0 0 0  
1 7 4 0 0 0 0  
1 11 4 0 0 0 0  
2 3 2 0 0 0 0  
2 4 1 0 0 0 0  
4 5 2 0 0 0 0  
4 23 1 0 0 0 0  
5 6 1 0 0 0 0  
5 24 1 0 0 0 0  
6 12 4 0 0 0 0  
6 19 4 0 0 0 0

7 8 4 0 0 0 0  
8 9 4 0 0 0 0  
8 2 5 1 0 0 0 0  
9 1 0 4 0 0 0 0  
9 2 0 1 0 0 0 0  
1 0 1 1 4 0 0 0 0  
1 1 3 3 1 0 0 0 0  
1 2 1 3 4 0 0 0 0  
1 2 3 4 1 0 0 0 0  
1 3 1 4 4 0 0 0 0  
1 3 3 5 1 0 0 0 0  
1 4 1 5 1 0 0 0 0  
1 4 1 6 4 0 0 0 0  
1 6 1 7 1 0 0 0 0  
1 6 1 9 4 0 0 0 0  
1 7 1 8 1 0 0 0 0  
1 8 3 6 1 0 0 0 0  
1 8 3 7 1 0 0 0 0  
1 8 3 8 1 0 0 0 0  
1 9 3 9 1 0 0 0 0  
2 0 2 1 1 0 0 0 0  
2 0 2 2 1 0 0 0 0  
2 0 3 2 1 0 0 0 0  
2 1 2 6 1 0 0 0 0  
2 1 2 7 1 0 0 0 0  
2 1 2 8 1 0 0 0 0  
2 2 2 9 1 0 0 0 0  
2 2 3 0 1 0 0 0 0  
2 2 3 1 1 0 0 0 0

M END

\$\$\$\$

4c\_PR





-1.5678 1.8900 -0.0000 H 0 0 0 0 0 0 0 0 0 0 0 0  
-3.6418 3.2367 0.0001 H 0 0 0 0 0 0 0 0 0 0 0 0  
-6.7889 1.6466 0.0002 H 0 0 0 0 0 0 0 0 0 0 0 0  
-7.5776 -1.8910 -0.0004 H 0 0 0 0 0 0 0 0 0 0 0 0  
-6.0745 -2.2253 0.8986 H 0 0 0 0 0 0 0 0 0 0 0 0  
-6.0743 -2.2249 -0.8993 H 0 0 0 0 0 0 0 0 0 0 0 0  
-3.8884 -1.7543 -0.0002 H 0 0 0 0 0 0 0 0 0 0 0 0

1 2 1 0 0 0 0  
1 7 4 0 0 0 0  
1 11 4 0 0 0 0  
2 3 2 0 0 0 0  
2 4 1 0 0 0 0  
4 5 2 0 0 0 0  
4 23 1 0 0 0 0  
5 6 1 0 0 0 0  
5 24 1 0 0 0 0  
6 12 4 0 0 0 0  
6 19 4 0 0 0 0  
7 8 4 0 0 0 0  
8 9 4 0 0 0 0  
8 25 1 0 0 0 0  
9 10 4 0 0 0 0  
9 20 1 0 0 0 0  
10 11 4 0 0 0 0  
11 33 1 0 0 0 0  
12 13 4 0 0 0 0  
12 34 1 0 0 0 0  
13 14 4 0 0 0 0  
13 35 1 0 0 0 0  
14 15 1 0 0 0 0  
14 16 4 0 0 0 0  
15 36 1 0 0 0 0  
16 17 1 0 0 0 0  
16 19 4 0 0 0 0



4.1344 1.3501 -0.1463 C 0 0 0 0 0 0 0 0 0 0 0 0  
2.8004 0.9601 -0.1283 C 0 0 0 0 0 0 0 0 0 0 0 0  
1.8069 1.8807 -0.2663 O 0 0 0 0 0 0 0 0 0 0 0 0  
-1.8487 1.6247 0.5941 H 0 0 0 0 0 0 0 0 0 0 0 0  
-5.9262 -0.9396 -0.5156 H 0 0 0 0 0 0 0 0 0 0 0 0  
2.1914 2.7530 -0.3771 H 0 0 0 0 0 0 0 0 0 0 0 0  
-0.1218 0.8057 -0.2258 H 0 0 0 0 0 0 0 0 0 0 0 0  
1.0112 -1.9774 0.2219 H 0 0 0 0 0 0 0 0 0 0 0 0  
-4.0395 2.7343 0.6158 H 0 0 0 0 0 0 0 0 0 0 0 0  
-6.0826 1.4635 0.0538 H 0 0 0 0 0 0 0 0 0 0 0 0  
-3.7052 -2.0631 -0.5140 H 0 0 0 0 0 0 0 0 0 0 0 0  
3.2358 -2.3544 0.3043 H 0 0 0 0 0 0 0 0 0 0 0 0  
5.6057 -1.6722 0.2695 H 0 0 0 0 0 0 0 0 0 0 0 0  
6.1769 0.7313 -0.0216 H 0 0 0 0 0 0 0 0 0 0 0 0  
4.3783 2.3982 -0.2729 H 0 0 0 0 0 0 0 0 0 0 0 0  
1 2 1 0 0 0 0  
1 7 4 0 0 0 0  
1 11 4 0 0 0 0  
2 3 2 0 0 0 0  
2 4 1 0 0 0 0  
4 5 2 0 0 0 0  
4 21 1 0 0 0 0  
5 6 1 0 0 0 0  
5 22 1 0 0 0 0  
6 12 4 0 0 0 0  
6 16 4 0 0 0 0  
7 8 4 0 0 0 0  
7 18 1 0 0 0 0  
8 9 4 0 0 0 0  
8 23 1 0 0 0 0  
9 10 4 0 0 0 0  
9 24 1 0 0 0 0  
10 11 4 0 0 0 0  
10 19 1 0 0 0 0

11 25 1 0 0 0 0  
12 13 4 0 0 0 0  
12 26 1 0 0 0 0  
13 14 4 0 0 0 0  
13 27 1 0 0 0 0  
14 15 4 0 0 0 0  
14 28 1 0 0 0 0  
15 16 4 0 0 0 0  
15 29 1 0 0 0 0  
16 17 1 0 0 0 0  
17 20 1 0 0 0 0

M END

\$\$\$\$

1\_A

28 29 0 0 0 0 0 0 0 0 0 V2000

-2.5893 -0.2885 0.0193 C 0 0 0 0 0 0 0 0 0 0 0 0  
-1.2862 -1.0607 0.0299 C 0 0 0 0 0 0 0 0 0 0 0 0  
-1.3526 -2.2883 0.0821 O 0 0 0 0 0 0 0 0 0 0 0 0  
-0.0578 -0.2997 -0.0315 C 0 0 0 0 0 0 0 0 0 0 0 0  
1.1409 -0.9442 0.0430 C 0 0 0 0 0 0 0 0 0 0 0 0  
2.4539 -0.3888 0.0102 C 0 0 0 0 0 0 0 0 0 0 0 0  
-2.6686 1.0844 0.2532 C 0 0 0 0 0 0 0 0 0 0 0 0  
-3.9016 1.7276 0.2493 C 0 0 0 0 0 0 0 0 0 0 0 0  
-5.0665 1.0100 0.0052 C 0 0 0 0 0 0 0 0 0 0 0 0  
-4.9947 -0.3603 -0.2281 C 0 0 0 0 0 0 0 0 0 0 0 0  
-3.7648 -1.0024 -0.2148 C 0 0 0 0 0 0 0 0 0 0 0 0  
3.5445 -1.2817 0.1020 C 0 0 0 0 0 0 0 0 0 0 0 0  
4.8548 -0.8666 0.0888 C 0 0 0 0 0 0 0 0 0 0 0 0  
5.1113 0.5198 -0.0186 C 0 0 0 0 0 0 0 0 0 0 0 0  
4.0932 1.4288 -0.1073 C 0 0 0 0 0 0 0 0 0 0 0 0  
2.6969 1.0444 -0.1011 C 0 0 0 0 0 0 0 0 0 0 0 0  
1.7889 1.9026 -0.1837 O 0 0 0 0 0 0 0 0 0 0 0 0

-1.7716 1.6526 0.4513 H 0 0 0 0 0 0 0 0 0 0 0 0  
-5.8983 -0.9249 -0.4181 H 0 0 0 0 0 0 0 0 0 0 0 0  
-0.0647 0.7691 -0.1483 H 0 0 0 0 0 0 0 0 0 0 0 0  
1.0865 -2.0257 0.1467 H 0 0 0 0 0 0 0 0 0 0 0 0  
-3.9497 2.7920 0.4377 H 0 0 0 0 0 0 0 0 0 0 0 0  
-6.0239 1.5144 -0.0012 H 0 0 0 0 0 0 0 0 0 0 0 0  
-3.6799 -2.0674 -0.3794 H 0 0 0 0 0 0 0 0 0 0 0 0  
3.3183 -2.3399 0.1860 H 0 0 0 0 0 0 0 0 0 0 0 0  
5.6672 -1.5765 0.1597 H 0 0 0 0 0 0 0 0 0 0 0 0  
6.1380 0.8702 -0.0299 H 0 0 0 0 0 0 0 0 0 0 0 0  
4.2921 2.4899 -0.1890 H 0 0 0 0 0 0 0 0 0 0 0 0  
1 2 1 0 0 0 0  
1 7 4 0 0 0 0  
1 11 4 0 0 0 0  
2 3 2 0 0 0 0  
2 4 1 0 0 0 0  
4 5 2 0 0 0 0  
4 20 1 0 0 0 0  
5 6 1 0 0 0 0  
5 21 1 0 0 0 0  
6 12 4 0 0 0 0  
6 16 4 0 0 0 0  
7 8 4 0 0 0 0  
7 18 1 0 0 0 0  
8 9 4 0 0 0 0  
8 22 1 0 0 0 0  
9 10 4 0 0 0 0  
9 23 1 0 0 0 0  
10 11 4 0 0 0 0  
10 19 1 0 0 0 0  
11 24 1 0 0 0 0  
12 13 4 0 0 0 0  
12 25 1 0 0 0 0  
13 14 4 0 0 0 0

13 26 1 0 0 0 0  
14 15 4 0 0 0 0  
14 27 1 0 0 0 0  
15 16 4 0 0 0 0  
15 28 1 0 0 0 0  
16 17 1 0 0 0 0

M END

\$\$\$\$

1\_NR

28 29 0 0 0 0 0 0 0 0 V2000

-2.6144 -0.2842 0.0064 C 0 0 0 0 0 0 0 0 0 0 0 0  
-1.3259 -1.0423 -0.0058 C 0 0 0 0 0 0 0 0 0 0 0 0  
-1.3266 -2.2575 0.0202 O 0 0 0 0 0 0 0 0 0 0 0 0  
-0.0530 -0.2755 -0.0644 C 0 0 0 0 0 0 0 0 0 0 0 0  
1.1082 -0.9439 0.0642 C 0 0 0 0 0 0 0 0 0 0 0 0  
2.4475 -0.4084 0.0326 C 0 0 0 0 0 0 0 0 0 0 0 0  
-2.6835 1.0878 0.2494 C 0 0 0 0 0 0 0 0 0 0 0 0  
-3.9157 1.7297 0.2707 C 0 0 0 0 0 0 0 0 0 0 0 0  
-5.0801 1.0090 0.0393 C 0 0 0 0 0 0 0 0 0 0 0 0  
-5.0165 -0.3604 -0.2040 C 0 0 0 0 0 0 0 0 0 0 0 0  
-3.7902 -1.0042 -0.2140 C 0 0 0 0 0 0 0 0 0 0 0 0  
3.5155 -1.2949 0.1497 C 0 0 0 0 0 0 0 0 0 0 0 0  
4.8343 -0.8635 0.1260 C 0 0 0 0 0 0 0 0 0 0 0 0  
5.1450 0.5099 -0.0170 C 0 0 0 0 0 0 0 0 0 0 0 0  
4.1440 1.4235 -0.1319 C 0 0 0 0 0 0 0 0 0 0 0 0  
2.7430 1.0278 -0.1116 C 0 0 0 0 0 0 0 0 0 0 0 0  
1.8587 1.8849 -0.2086 O 0 0 0 0 0 0 0 0 0 0 0 0  
-1.7890 1.6619 0.4414 H 0 0 0 0 0 0 0 0 0 0 0 0  
-5.9233 -0.9209 -0.3835 H 0 0 0 0 0 0 0 0 0 0 0 0  
-0.0611 0.7877 -0.2239 H 0 0 0 0 0 0 0 0 0 0 0 0  
1.0345 -2.0175 0.2066 H 0 0 0 0 0 0 0 0 0 0 0 0  
-3.9644 2.7916 0.4673 H 0 0 0 0 0 0 0 0 0 0 0 0

-6.0371 1.5125 0.0502 H 0 0 0 0 0 0 0 0 0 0 0 0  
-3.7150 -2.0676 -0.3910 H 0 0 0 0 0 0 0 0 0 0 0 0  
3.3026 -2.3501 0.2597 H 0 0 0 0 0 0 0 0 0 0 0 0  
5.6336 -1.5848 0.2177 H 0 0 0 0 0 0 0 0 0 0 0 0  
6.1794 0.8243 -0.0333 H 0 0 0 0 0 0 0 0 0 0 0 0  
4.3335 2.4817 -0.2415 H 0 0 0 0 0 0 0 0 0 0 0 0

1 2 1 0 0 0 0  
1 7 4 0 0 0 0  
1 11 4 0 0 0 0  
2 3 2 0 0 0 0  
2 4 1 0 0 0 0  
4 5 2 0 0 0 0  
4 20 1 0 0 0 0  
5 6 1 0 0 0 0  
5 21 1 0 0 0 0  
6 12 4 0 0 0 0  
6 16 4 0 0 0 0  
7 8 4 0 0 0 0  
7 18 1 0 0 0 0  
8 9 4 0 0 0 0  
8 22 1 0 0 0 0  
9 10 4 0 0 0 0  
9 23 1 0 0 0 0  
10 11 4 0 0 0 0  
10 19 1 0 0 0 0  
11 24 1 0 0 0 0  
12 13 4 0 0 0 0  
12 25 1 0 0 0 0  
13 14 4 0 0 0 0  
13 26 1 0 0 0 0  
14 15 4 0 0 0 0  
14 27 1 0 0 0 0  
15 16 4 0 0 0 0  
15 28 1 0 0 0 0





```
6.1574 0.6732 0.1005 H 0 0 0 0 0 0 0 0 0 0 0 0
4.4379 2.3691 -0.3428 H 0 0 0 0 0 0 0 0 0 0 0 0
1 2 1 0 0 0 0
1 7 4 0 0 0 0
1 11 4 0 0 0 0
2 3 2 0 0 0 0
2 4 1 0 0 0 0
4 5 2 0 0 0 0
4 21 1 0 0 0 0
5 6 1 0 0 0 0
5 22 1 0 0 0 0
6 12 4 0 0 0 0
6 16 4 0 0 0 0
7 8 4 0 0 0 0
7 18 1 0 0 0 0
8 9 4 0 0 0 0
8 23 1 0 0 0 0
9 10 4 0 0 0 0
9 24 1 0 0 0 0
10 11 4 0 0 0 0
10 19 1 0 0 0 0
11 25 1 0 0 0 0
12 13 4 0 0 0 0
12 26 1 0 0 0 0
13 14 4 0 0 0 0
13 27 1 0 0 0 0
14 15 4 0 0 0 0
14 28 1 0 0 0 0
15 16 4 0 0 0 0
15 29 1 0 0 0 0
16 17 1 0 0 0 0
17 20 1 0 0 0 0
M END
$$$$
```

1a

```
27 28 0 0 0 0 0 0 0 0 V2000
-2.6369 -0.2664 0.0080 C 0 0 0 0 0 0 0 0 0 0 0 0
-1.3558 -1.0264 0.2194 C 0 0 0 0 0 0 0 0 0 0 0 0
-1.4021 -2.2039 0.5080 O 0 0 0 0 0 0 0 0 0 0 0 0
-0.0951 -0.2751 0.0547 C 0 0 0 0 0 0 0 0 0 0 0 0
1.0683 -0.9353 0.1824 C 0 0 0 0 0 0 0 0 0 0 0 0
2.4221 -0.4124 0.0364 C 0 0 0 0 0 0 0 0 0 0 0 0
-2.5746 1.0416 -0.2252 N 0 0 0 0 0 0 0 0 0 0 0 0
-3.7324 1.6665 -0.3969 C 0 0 0 0 0 0 0 0 0 0 0 0
-4.9447 0.9854 -0.3395 C 0 0 0 0 0 0 0 0 0 0 0 0
-5.0124 -0.3222 -0.1090 N 0 0 0 0 0 0 0 0 0 0 0 0
-3.8540 -0.9465 0.0670 C 0 0 0 0 0 0 0 0 0 0 0 0
3.4308 -1.2976 -0.3702 C 0 0 0 0 0 0 0 0 0 0 0 0
4.7276 -0.8714 -0.5849 C 0 0 0 0 0 0 0 0 0 0 0 0
5.0472 0.4665 -0.3605 C 0 0 0 0 0 0 0 0 0 0 0 0
4.0838 1.3535 0.0878 C 0 0 0 0 0 0 0 0 0 0 0 0
2.7773 0.9224 0.2935 C 0 0 0 0 0 0 0 0 0 0 0 0
1.8999 1.8403 0.7696 O 0 0 0 0 0 0 0 0 0 0 0 0
-0.1743 0.7596 -0.2433 H 0 0 0 0 0 0 0 0 0 0 0 0
0.9929 -1.9995 0.3857 H 0 0 0 0 0 0 0 0 0 0 0 0
-3.7005 2.7316 -0.5855 H 0 0 0 0 0 0 0 0 0 0 0 0
-5.8801 1.5104 -0.4843 H 0 0 0 0 0 0 0 0 0 0 0 0
-3.8676 -2.0100 0.2599 H 0 0 0 0 0 0 0 0 0 0 0 0
3.1653 -2.3336 -0.5368 H 0 0 0 0 0 0 0 0 0 0 0 0
5.4834 -1.5681 -0.9167 H 0 0 0 0 0 0 0 0 0 0 0 0
6.0577 0.8165 -0.5201 H 0 0 0 0 0 0 0 0 0 0 0 0
4.3183 2.3871 0.2984 H 0 0 0 0 0 0 0 0 0 0 0 0
1.1019 1.4001 1.0778 H 0 0 0 0 0 0 0 0 0 0 0 0
1 2 1 0 0 0 0
1 7 4 0 0 0 0
1 11 4 0 0 0 0
```

2 3 2 0 0 0 0  
2 4 1 0 0 0 0  
4 5 2 0 0 0 0  
4 18 1 0 0 0 0  
5 6 1 0 0 0 0  
5 19 1 0 0 0 0  
6 12 4 0 0 0 0  
6 16 4 0 0 0 0  
7 8 4 0 0 0 0  
8 9 4 0 0 0 0  
8 20 1 0 0 0 0  
9 10 4 0 0 0 0  
9 21 1 0 0 0 0  
10 11 4 0 0 0 0  
11 22 1 0 0 0 0  
12 13 4 0 0 0 0  
12 23 1 0 0 0 0  
13 14 4 0 0 0 0  
13 24 1 0 0 0 0  
14 15 4 0 0 0 0  
14 25 1 0 0 0 0  
15 16 4 0 0 0 0  
15 26 1 0 0 0 0  
16 17 1 0 0 0 0  
17 27 1 0 0 0 0

M END

\$\$\$\$

1a\_A

26 27 0 0 0 0 0 0 0 0 V2000  
-2.6116 -0.2479 -0.0001 C 0 0 0 0 0 0 0 0 0 0 0  
-1.3003 -1.0130 -0.0003 C 0 0 0 0 0 0 0 0 0 0 0  
-1.3873 -2.2435 -0.0004 O 0 0 0 0 0 0 0 0 0 0 0

-0.0924 -0.2370 -0.0003 C 0 0 0 0 0 0 0 0 0 0 0 0  
1.1068 -0.8976 -0.0002 C 0 0 0 0 0 0 0 0 0 0 0 0  
2.4277 -0.3767 -0.0001 C 0 0 0 0 0 0 0 0 0 0 0 0  
-2.6177 1.0811 -0.0006 N 0 0 0 0 0 0 0 0 0 0 0 0  
-3.8077 1.6712 -0.0004 C 0 0 0 0 0 0 0 0 0 0 0 0  
-4.9911 0.9464 0.0003 C 0 0 0 0 0 0 0 0 0 0 0 0  
-5.0006 -0.3862 0.0008 N 0 0 0 0 0 0 0 0 0 0 0 0  
-3.8104 -0.9740 0.0006 C 0 0 0 0 0 0 0 0 0 0 0 0  
3.4968 -1.3047 -0.0001 C 0 0 0 0 0 0 0 0 0 0 0 0  
4.8154 -0.9257 0.0001 C 0 0 0 0 0 0 0 0 0 0 0 0  
5.1116 0.4602 0.0003 C 0 0 0 0 0 0 0 0 0 0 0 0  
4.1219 1.4009 0.0003 C 0 0 0 0 0 0 0 0 0 0 0 0  
2.7117 1.0557 0.0001 C 0 0 0 0 0 0 0 0 0 0 0 0  
1.8313 1.9389 -0.0000 O 0 0 0 0 0 0 0 0 0 0 0 0  
-0.1388 0.8378 -0.0002 H 0 0 0 0 0 0 0 0 0 0 0 0  
1.0338 -1.9831 -0.0003 H 0 0 0 0 0 0 0 0 0 0 0 0  
-3.8203 2.7545 -0.0008 H 0 0 0 0 0 0 0 0 0 0 0 0  
-5.9503 1.4495 0.0005 H 0 0 0 0 0 0 0 0 0 0 0 0  
-3.7669 -2.0534 0.0010 H 0 0 0 0 0 0 0 0 0 0 0 0  
3.2419 -2.3597 -0.0002 H 0 0 0 0 0 0 0 0 0 0 0 0  
5.6088 -1.6600 0.0001 H 0 0 0 0 0 0 0 0 0 0 0 0  
6.1485 0.7800 0.0005 H 0 0 0 0 0 0 0 0 0 0 0 0  
4.3492 2.4595 0.0005 H 0 0 0 0 0 0 0 0 0 0 0 0  
1 2 1 0 0 0 0  
1 7 4 0 0 0 0  
1 11 4 0 0 0 0  
2 3 2 0 0 0 0  
2 4 1 0 0 0 0  
4 5 2 0 0 0 0  
4 18 1 0 0 0 0  
5 6 1 0 0 0 0  
5 19 1 0 0 0 0  
6 12 4 0 0 0 0  
6 16 4 0 0 0 0

7 8 4 0 0 0 0  
8 9 4 0 0 0 0  
8 20 1 0 0 0 0  
9 10 4 0 0 0 0  
9 21 1 0 0 0 0  
10 11 4 0 0 0 0  
11 22 1 0 0 0 0  
12 13 4 0 0 0 0  
12 23 1 0 0 0 0  
13 14 4 0 0 0 0  
13 24 1 0 0 0 0  
14 15 4 0 0 0 0  
14 25 1 0 0 0 0  
15 16 4 0 0 0 0  
15 26 1 0 0 0 0  
16 17 1 0 0 0 0

M END

\$\$\$\$

1a\_NR

26 27 0 0 0 0 0 0 0 0 V2000

-2.6350 -0.2679 -0.0001 C 0 0 0 0 0 0 0 0 0 0 0 0  
-1.3429 -1.0366 -0.0005 C 0 0 0 0 0 0 0 0 0 0 0 0  
-1.3725 -2.2505 -0.0007 O 0 0 0 0 0 0 0 0 0 0 0 0  
-0.0872 -0.2543 -0.0004 C 0 0 0 0 0 0 0 0 0 0 0 0  
1.0760 -0.9340 -0.0000 C 0 0 0 0 0 0 0 0 0 0 0 0  
2.4189 -0.4078 0.0001 C 0 0 0 0 0 0 0 0 0 0 0 0  
-2.5906 1.0611 -0.0001 N 0 0 0 0 0 0 0 0 0 0 0 0  
-3.7583 1.6900 0.0002 C 0 0 0 0 0 0 0 0 0 0 0 0  
-4.9634 0.9935 0.0005 C 0 0 0 0 0 0 0 0 0 0 0 0  
-5.0136 -0.3352 0.0005 N 0 0 0 0 0 0 0 0 0 0 0 0  
-3.8446 -0.9644 0.0001 C 0 0 0 0 0 0 0 0 0 0 0 0  
3.4799 -1.3097 0.0005 C 0 0 0 0 0 0 0 0 0 0 0 0

4.8027 -0.8877 0.0006 C 0 0 0 0 0 0 0 0 0 0 0 0  
5.1233 0.4906 0.0003 C 0 0 0 0 0 0 0 0 0 0 0 0  
4.1285 1.4189 -0.0001 C 0 0 0 0 0 0 0 0 0 0 0 0  
2.7241 1.0333 -0.0002 C 0 0 0 0 0 0 0 0 0 0 0 0  
1.8455 1.8997 -0.0006 O 0 0 0 0 0 0 0 0 0 0 0 0  
-0.1389 0.8203 -0.0007 H 0 0 0 0 0 0 0 0 0 0 0 0  
1.0022 -2.0173 0.0002 H 0 0 0 0 0 0 0 0 0 0 0 0  
-3.7402 2.7720 0.0002 H 0 0 0 0 0 0 0 0 0 0 0 0  
-5.9071 1.5236 0.0008 H 0 0 0 0 0 0 0 0 0 0 0 0  
-3.8440 -2.0453 0.0001 H 0 0 0 0 0 0 0 0 0 0 0 0  
3.2602 -2.3693 0.0007 H 0 0 0 0 0 0 0 0 0 0 0 0  
5.5968 -1.6203 0.0008 H 0 0 0 0 0 0 0 0 0 0 0 0  
6.1601 0.7973 0.0004 H 0 0 0 0 0 0 0 0 0 0 0 0  
4.3253 2.4815 -0.0003 H 0 0 0 0 0 0 0 0 0 0 0 0  
1 2 1 0 0 0 0  
1 7 4 0 0 0 0  
1 11 4 0 0 0 0  
2 3 2 0 0 0 0  
2 4 1 0 0 0 0  
4 5 2 0 0 0 0  
4 18 1 0 0 0 0  
5 6 1 0 0 0 0  
5 19 1 0 0 0 0  
6 12 4 0 0 0 0  
6 16 4 0 0 0 0  
7 8 4 0 0 0 0  
8 9 4 0 0 0 0  
8 20 1 0 0 0 0  
9 10 4 0 0 0 0  
9 21 1 0 0 0 0  
10 11 4 0 0 0 0  
11 22 1 0 0 0 0  
12 13 4 0 0 0 0  
12 23 1 0 0 0 0

13 14 4 0 0 0 0  
13 24 1 0 0 0 0  
14 15 4 0 0 0 0  
14 25 1 0 0 0 0  
15 16 4 0 0 0 0  
15 26 1 0 0 0 0  
16 17 1 0 0 0 0

M END

\$\$\$\$

1a\_PR

27 28 0 0 0 0 0 0 0 0 V2000

-2.6246 -0.2866 -0.0110 C 0 0 0 0 0 0 0 0 0 0 0 0  
-1.3785 -1.0757 0.1796 C 0 0 0 0 0 0 0 0 0 0 0 0  
-1.3832 -2.2514 0.4483 O 0 0 0 0 0 0 0 0 0 0 0 0  
-0.0796 -0.3332 0.0247 C 0 0 0 0 0 0 0 0 0 0 0 0  
1.0644 -1.0120 0.2413 C 0 0 0 0 0 0 0 0 0 0 0 0  
2.3990 -0.4880 0.0779 C 0 0 0 0 0 0 0 0 0 0 0 0  
-2.4970 1.0230 -0.2299 N 0 0 0 0 0 0 0 0 0 0 0 0  
-3.6224 1.7017 -0.3907 C 0 0 0 0 0 0 0 0 0 0 0 0  
-4.8668 1.0682 -0.3368 C 0 0 0 0 0 0 0 0 0 0 0 0  
-4.9921 -0.2347 -0.1192 N 0 0 0 0 0 0 0 0 0 0 0 0  
-3.8652 -0.9173 0.0470 C 0 0 0 0 0 0 0 0 0 0 0 0  
3.4371 -1.3178 -0.3395 C 0 0 0 0 0 0 0 0 0 0 0 0  
4.6859 -0.7926 -0.6171 C 0 0 0 0 0 0 0 0 0 0 0 0  
4.9575 0.5973 -0.4443 C 0 0 0 0 0 0 0 0 0 0 0 0  
3.9944 1.4372 0.0226 C 0 0 0 0 0 0 0 0 0 0 0 0  
2.7227 0.9027 0.3420 C 0 0 0 0 0 0 0 0 0 0 0 0  
1.8837 1.7053 0.9345 O 0 0 0 0 0 0 0 0 0 0 0 0  
-0.1345 0.6898 -0.3251 H 0 0 0 0 0 0 0 0 0 0 0 0  
0.9739 -2.0700 0.4707 H 0 0 0 0 0 0 0 0 0 0 0 0  
-3.5470 2.7657 -0.5689 H 0 0 0 0 0 0 0 0 0 0 0 0  
-5.7782 1.6351 -0.4743 H 0 0 0 0 0 0 0 0 0 0 0 0



-3.9332 -1.9814 0.2285 H 0 0 0 0 0 0 0 0 0 0 0 0  
3.2377 -2.3681 -0.4983 H 0 0 0 0 0 0 0 0 0 0 0 0  
5.4698 -1.4395 -0.9839 H 0 0 0 0 0 0 0 0 0 0 0 0  
5.9443 0.9749 -0.6713 H 0 0 0 0 0 0 0 0 0 0 0 0  
4.1693 2.4867 0.2097 H 0 0 0 0 0 0 0 0 0 0 0 0  
1.0735 1.2535 1.2199 H 0 0 0 0 0 0 0 0 0 0 0 0  
1 2 1 0 0 0 0  
1 7 4 0 0 0 0  
1 11 4 0 0 0 0  
2 3 2 0 0 0 0  
2 4 1 0 0 0 0  
4 5 2 0 0 0 0  
4 18 1 0 0 0 0  
5 6 1 0 0 0 0  
5 19 1 0 0 0 0  
6 12 4 0 0 0 0  
6 16 4 0 0 0 0  
7 8 4 0 0 0 0  
8 9 4 0 0 0 0  
8 20 1 0 0 0 0  
9 10 4 0 0 0 0  
9 21 1 0 0 0 0  
10 11 4 0 0 0 0  
11 22 1 0 0 0 0  
12 13 4 0 0 0 0  
12 23 1 0 0 0 0  
13 14 4 0 0 0 0  
13 24 1 0 0 0 0  
14 15 4 0 0 0 0  
14 25 1 0 0 0 0  
15 16 4 0 0 0 0  
15 26 1 0 0 0 0  
16 17 1 0 0 0 0  
17 27 1 0 0 0 0



3.9517 2.3665 -0.6818 H 0 0 0 0 0 0 0 0 0 0 0 0

1 2 1 0 0 0 0  
1 7 4 0 0 0 0  
1 11 4 0 0 0 0  
2 3 2 0 0 0 0  
2 4 1 0 0 0 0  
4 5 2 0 0 0 0  
4 21 1 0 0 0 0  
5 6 1 0 0 0 0  
5 22 1 0 0 0 0  
6 12 4 0 0 0 0  
6 16 4 0 0 0 0  
7 8 4 0 0 0 0  
7 18 1 0 0 0 0  
8 9 4 0 0 0 0  
8 23 1 0 0 0 0  
9 10 4 0 0 0 0  
9 24 1 0 0 0 0  
10 11 4 0 0 0 0  
10 19 1 0 0 0 0  
11 25 1 0 0 0 0  
12 13 4 0 0 0 0  
12 26 1 0 0 0 0  
13 14 4 0 0 0 0  
13 27 1 0 0 0 0  
14 15 4 0 0 0 0  
14 17 1 0 0 0 0  
15 16 4 0 0 0 0  
15 29 1 0 0 0 0  
16 20 1 0 0 0 0  
17 28 1 0 0 0 0

M END

\$\$\$

3\_A



2 3 2 0 0 0 0  
2 4 1 0 0 0 0  
4 5 2 0 0 0 0  
4 2 1 1 0 0 0 0  
5 6 1 0 0 0 0  
5 2 2 1 0 0 0 0  
6 1 2 4 0 0 0 0  
6 1 6 4 0 0 0 0  
7 8 4 0 0 0 0  
7 1 8 1 0 0 0 0  
8 9 4 0 0 0 0  
8 2 3 1 0 0 0 0  
9 1 0 4 0 0 0 0  
9 2 4 1 0 0 0 0  
10 1 1 4 0 0 0 0  
10 1 9 1 0 0 0 0  
11 2 5 1 0 0 0 0  
12 1 3 4 0 0 0 0  
12 2 6 1 0 0 0 0  
13 1 4 4 0 0 0 0  
13 2 7 1 0 0 0 0  
14 1 5 4 0 0 0 0  
14 1 7 1 0 0 0 0  
15 1 6 4 0 0 0 0  
15 2 8 1 0 0 0 0  
16 2 0 1 0 0 0 0

M END

\$\$\$\$

3\_NR

28 29 0 0 0 0 0 0 0 0 V2000  
-2.8650 -0.1956 0.0146 C 0 0 0 0 0 0 0 0 0 0 0  
-1.5948 -0.9817 0.0246 C 0 0 0 0 0 0 0 0 0 0 0

-1.6198 -2.1960 0.0617 O 0 0 0 0 0 0 0 0 0 0 0 0  
-0.3053 -0.2494 -0.0398 C 0 0 0 0 0 0 0 0 0 0 0 0  
0.8505 -0.9352 0.0968 C 0 0 0 0 0 0 0 0 0 0 0 0  
2.1801 -0.3976 0.0354 C 0 0 0 0 0 0 0 0 0 0 0 0  
-4.0399 -0.8689 -0.3233 C 0 0 0 0 0 0 0 0 0 0 0 0  
-5.2505 -0.1954 -0.3397 C 0 0 0 0 0 0 0 0 0 0 0 0  
-5.3002 1.1538 -0.0017 C 0 0 0 0 0 0 0 0 0 0 0 0  
-4.1373 1.8260 0.3526 C 0 0 0 0 0 0 0 0 0 0 0 0  
-2.9205 1.1560 0.3544 C 0 0 0 0 0 0 0 0 0 0 0 0  
3.2748 -1.2851 0.2241 C 0 0 0 0 0 0 0 0 0 0 0 0  
4.5612 -0.8450 0.1801 C 0 0 0 0 0 0 0 0 0 0 0 0  
4.8616 0.5587 -0.0639 C 0 0 0 0 0 0 0 0 0 0 0 0  
3.7213 1.4488 -0.2571 C 0 0 0 0 0 0 0 0 0 0 0 0  
2.4486 0.9821 -0.2079 C 0 0 0 0 0 0 0 0 0 0 0 0  
6.0202 0.9765 -0.1064 O 0 0 0 0 0 0 0 0 0 0 0 0  
-3.9781 -1.9195 -0.5690 H 0 0 0 0 0 0 0 0 0 0 0 0  
-4.1773 2.8704 0.6289 H 0 0 0 0 0 0 0 0 0 0 0 0  
1.6244 1.6645 -0.3583 H 0 0 0 0 0 0 0 0 0 0 0 0  
-0.3187 0.8133 -0.2246 H 0 0 0 0 0 0 0 0 0 0 0 0  
0.7599 -2.0019 0.2701 H 0 0 0 0 0 0 0 0 0 0 0 0  
-6.1561 -0.7191 -0.6120 H 0 0 0 0 0 0 0 0 0 0 0 0  
-6.2452 1.6792 -0.0102 H 0 0 0 0 0 0 0 0 0 0 0 0  
-2.0279 1.6884 0.6506 H 0 0 0 0 0 0 0 0 0 0 0 0  
3.0602 -2.3303 0.4059 H 0 0 0 0 0 0 0 0 0 0 0 0  
5.4027 -1.5078 0.3220 H 0 0 0 0 0 0 0 0 0 0 0 0  
3.9453 2.4900 -0.4414 H 0 0 0 0 0 0 0 0 0 0 0 0  
1 2 1 0 0 0 0  
1 7 4 0 0 0 0  
1 11 4 0 0 0 0  
2 3 2 0 0 0 0  
2 4 1 0 0 0 0  
4 5 2 0 0 0 0  
4 21 1 0 0 0 0  
5 6 1 0 0 0 0



5.3254 0.2331 -0.2105 C 0 0 0 0 0 0 0 0 0 0 0 0  
5.3693 -1.1316 0.0650 C 0 0 0 0 0 0 0 0 0 0 0 0  
4.1980 -1.8379 0.3114 C 0 0 0 0 0 0 0 0 0 0 0 0  
2.9754 -1.1842 0.2691 C 0 0 0 0 0 0 0 0 0 0 0 0  
-3.1986 1.3098 0.2656 C 0 0 0 0 0 0 0 0 0 0 0 0  
-4.4900 0.8849 0.2364 C 0 0 0 0 0 0 0 0 0 0 0 0  
-4.7572 -0.4810 -0.0280 C 0 0 0 0 0 0 0 0 0 0 0 0  
-3.7043 -1.4030 -0.2634 C 0 0 0 0 0 0 0 0 0 0 0 0  
-2.4170 -0.9655 -0.2334 C 0 0 0 0 0 0 0 0 0 0 0 0  
-6.0198 -0.8366 -0.0442 O 0 0 0 0 0 0 0 0 0 0 0 0  
4.0517 1.9519 -0.4449 H 0 0 0 0 0 0 0 0 0 0 0 0  
4.2386 -2.8939 0.5366 H 0 0 0 0 0 0 0 0 0 0 0 0  
-1.6184 -1.6681 -0.4180 H 0 0 0 0 0 0 0 0 0 0 0 0  
0.3509 -0.8564 -0.2980 H 0 0 0 0 0 0 0 0 0 0 0 0  
-0.6779 1.9807 0.2677 H 0 0 0 0 0 0 0 0 0 0 0 0  
6.2399 0.7769 -0.3984 H 0 0 0 0 0 0 0 0 0 0 0 0  
6.3203 -1.6449 0.0911 H 0 0 0 0 0 0 0 0 0 0 0 0  
2.0783 -1.7484 0.4822 H 0 0 0 0 0 0 0 0 0 0 0 0  
-2.9724 2.3484 0.4654 H 0 0 0 0 0 0 0 0 0 0 0 0  
-5.3251 1.5486 0.4073 H 0 0 0 0 0 0 0 0 0 0 0 0  
-6.1499 -1.7745 -0.2312 H 0 0 0 0 0 0 0 0 0 0 0 0  
-3.9361 -2.4404 -0.4670 H 0 0 0 0 0 0 0 0 0 0 0 0  
1 2 1 0 0 0 0  
1 7 4 0 0 0 0  
1 11 4 0 0 0 0  
2 3 2 0 0 0 0  
2 4 1 0 0 0 0  
4 5 2 0 0 0 0  
4 21 1 0 0 0 0  
5 6 1 0 0 0 0  
5 22 1 0 0 0 0  
6 12 4 0 0 0 0  
6 16 4 0 0 0 0  
7 8 4 0 0 0 0



7 18 1 0 0 0 0  
8 9 4 0 0 0 0  
8 23 1 0 0 0 0  
9 10 4 0 0 0 0  
9 24 1 0 0 0 0  
10 11 4 0 0 0 0  
10 19 1 0 0 0 0  
11 25 1 0 0 0 0  
12 13 4 0 0 0 0  
12 26 1 0 0 0 0  
13 14 4 0 0 0 0  
13 27 1 0 0 0 0  
14 15 4 0 0 0 0  
14 17 1 0 0 0 0  
15 16 4 0 0 0 0  
15 29 1 0 0 0 0  
16 20 1 0 0 0 0  
17 28 1 0 0 0 0

M END

\$\$\$\$

3a

27 28 0 0 0 0 0 0 0 0 V2000

2.9458 0.1678 -0.0001 C 0 0 0 0 0 0 0 0 0 0 0 0  
1.6799 0.9851 -0.0004 C 0 0 0 0 0 0 0 0 0 0 0 0  
1.7635 2.1974 -0.0005 O 0 0 0 0 0 0 0 0 0 0 0 0  
0.4047 0.2518 -0.0004 C 0 0 0 0 0 0 0 0 0 0 0 0  
-0.7412 0.9478 -0.0001 C 0 0 0 0 0 0 0 0 0 0 0 0  
-2.0983 0.4169 -0.0001 C 0 0 0 0 0 0 0 0 0 0 0 0  
2.8604 -1.1596 0.0001 N 0 0 0 0 0 0 0 0 0 0 0 0  
4.0090 -1.8247 0.0004 C 0 0 0 0 0 0 0 0 0 0 0 0  
5.2351 -1.1675 0.0004 C 0 0 0 0 0 0 0 0 0 0 0 0  
5.3268 0.1591 0.0002 N 0 0 0 0 0 0 0 0 0 0 0 0

4.1780 0.8242 -0.0000 C 0 0 0 0 0 0 0 0 0 0 0 0  
-2.3856 -0.9557 -0.0006 C 0 0 0 0 0 0 0 0 0 0 0 0  
-3.6872 -1.4128 -0.0005 C 0 0 0 0 0 0 0 0 0 0 0 0  
-4.7412 -0.4992 0.0001 C 0 0 0 0 0 0 0 0 0 0 0 0  
-6.0018 -1.0051 0.0003 O 0 0 0 0 0 0 0 0 0 0 0 0  
-4.4830 0.8668 0.0007 C 0 0 0 0 0 0 0 0 0 0 0 0  
-3.1699 1.3122 0.0005 C 0 0 0 0 0 0 0 0 0 0 0 0  
0.4498 -0.8258 -0.0005 H 0 0 0 0 0 0 0 0 0 0 0 0  
-0.6516 2.0299 0.0001 H 0 0 0 0 0 0 0 0 0 0 0 0  
3.9581 -2.9058 0.0005 H 0 0 0 0 0 0 0 0 0 0 0 0  
6.1616 -1.7273 0.0006 H 0 0 0 0 0 0 0 0 0 0 0 0  
4.2101 1.9045 -0.0002 H 0 0 0 0 0 0 0 0 0 0 0 0  
-1.5785 -1.6744 -0.0010 H 0 0 0 0 0 0 0 0 0 0 0 0  
-3.9152 -2.4690 -0.0010 H 0 0 0 0 0 0 0 0 0 0 0 0  
-6.6436 -0.2922 -0.0007 H 0 0 0 0 0 0 0 0 0 0 0 0  
-5.3019 1.5754 0.0012 H 0 0 0 0 0 0 0 0 0 0 0 0  
-2.9693 2.3757 0.0009 H 0 0 0 0 0 0 0 0 0 0 0 0  
1 2 1 0 0 0 0  
1 7 4 0 0 0 0  
1 11 4 0 0 0 0  
2 3 2 0 0 0 0  
2 4 1 0 0 0 0  
4 5 2 0 0 0 0  
4 18 1 0 0 0 0  
5 6 1 0 0 0 0  
5 19 1 0 0 0 0  
6 12 4 0 0 0 0  
6 17 4 0 0 0 0  
7 8 4 0 0 0 0  
8 9 4 0 0 0 0  
8 20 1 0 0 0 0  
9 10 4 0 0 0 0  
9 21 1 0 0 0 0  
10 11 4 0 0 0 0



0.4215 -0.8432 -0.0009 H 0 0 0 0 0 0 0 0 0 0 0 0  
-0.7394 1.9978 -0.0000 H 0 0 0 0 0 0 0 0 0 0 0 0  
3.9887 -2.8913 -0.0004 H 0 0 0 0 0 0 0 0 0 0 0 0  
6.1570 -1.6551 -0.0006 H 0 0 0 0 0 0 0 0 0 0 0 0  
4.0851 1.9161 -0.0002 H 0 0 0 0 0 0 0 0 0 0 0 0  
-1.6345 -1.7009 0.0011 H 0 0 0 0 0 0 0 0 0 0 0 0  
-3.9545 -2.5013 0.0010 H 0 0 0 0 0 0 0 0 0 0 0 0  
-5.3681 1.5693 -0.0012 H 0 0 0 0 0 0 0 0 0 0 0 0  
-3.0335 2.3646 -0.0009 H 0 0 0 0 0 0 0 0 0 0 0 0  
1 2 1 0 0 0 0  
1 7 4 0 0 0 0  
1 11 4 0 0 0 0  
2 3 2 0 0 0 0  
2 4 1 0 0 0 0  
4 5 2 0 0 0 0  
4 18 1 0 0 0 0  
5 6 1 0 0 0 0  
5 19 1 0 0 0 0  
6 12 4 0 0 0 0  
6 17 4 0 0 0 0  
7 8 4 0 0 0 0  
8 9 4 0 0 0 0  
8 20 1 0 0 0 0  
9 10 4 0 0 0 0  
9 21 1 0 0 0 0  
10 11 4 0 0 0 0  
11 22 1 0 0 0 0  
12 13 4 0 0 0 0  
12 23 1 0 0 0 0  
13 14 4 0 0 0 0  
13 24 1 0 0 0 0  
14 15 1 0 0 0 0  
14 16 4 0 0 0 0  
16 17 4 0 0 0 0



1 2 1 0 0 0 0  
1 7 4 0 0 0 0  
1 11 4 0 0 0 0  
2 3 2 0 0 0 0  
2 4 1 0 0 0 0  
4 5 2 0 0 0 0  
4 18 1 0 0 0 0  
5 6 1 0 0 0 0  
5 19 1 0 0 0 0  
6 12 4 0 0 0 0  
6 17 4 0 0 0 0  
7 8 4 0 0 0 0  
8 9 4 0 0 0 0  
8 20 1 0 0 0 0  
9 10 4 0 0 0 0  
9 21 1 0 0 0 0  
10 11 4 0 0 0 0  
11 22 1 0 0 0 0  
12 13 4 0 0 0 0  
12 23 1 0 0 0 0  
13 14 4 0 0 0 0  
13 24 1 0 0 0 0  
14 15 1 0 0 0 0  
14 16 4 0 0 0 0  
16 17 4 0 0 0 0  
16 25 1 0 0 0 0  
17 26 1 0 0 0 0

M END

\$\$\$

3a\_PR

27 28 0 0 0 0 0 0 0 0 V2000

2.9393 0.1927 -0.0003 C 0 0 0 0 0 0 0 0 0 0 0 0



5 19 1 0 0 0 0  
6 12 4 0 0 0 0  
6 17 4 0 0 0 0  
7 8 4 0 0 0 0  
8 9 4 0 0 0 0  
8 20 1 0 0 0 0  
9 10 4 0 0 0 0  
9 21 1 0 0 0 0  
10 11 4 0 0 0 0  
11 22 1 0 0 0 0  
12 13 4 0 0 0 0  
12 23 1 0 0 0 0  
13 14 4 0 0 0 0  
13 24 1 0 0 0 0  
14 15 1 0 0 0 0  
14 16 4 0 0 0 0  
15 25 1 0 0 0 0  
16 17 4 0 0 0 0  
16 26 1 0 0 0 0  
17 27 1 0 0 0 0

M END

\$\$\$\$

2

29 30 0 0 0 0 0 0 0 0 0 V2000

-2.8812 -0.2591 0.0106 C 0 0 0 0 0 0 0 0 0 0 0  
-1.5497 -0.9415 -0.0268 C 0 0 0 0 0 0 0 0 0 0 0  
-1.4853 -2.1546 -0.0108 O 0 0 0 0 0 0 0 0 0 0 0  
-0.3283 -0.1010 -0.1040 C 0 0 0 0 0 0 0 0 0 0 0  
0.8714 -0.6769 0.0227 C 0 0 0 0 0 0 0 0 0 0 0  
2.1793 -0.0213 -0.0438 C 0 0 0 0 0 0 0 0 0 0 0  
-4.0076 -1.0148 -0.3174 C 0 0 0 0 0 0 0 0 0 0 0  
-5.2676 -0.4392 -0.2890 C 0 0 0 0 0 0 0 0 0 0 0



-5.4152 0.8932 0.0856 C 0 0 0 0 0 0 0 0 0 0 0 0  
-4.3004 1.6465 0.4306 C 0 0 0 0 0 0 0 0 0 0 0 0  
-3.0348 1.0748 0.3869 C 0 0 0 0 0 0 0 0 0 0 0 0  
2.3385 1.3441 -0.2941 C 0 0 0 0 0 0 0 0 0 0 0 0  
3.6107 1.8939 -0.3394 C 0 0 0 0 0 0 0 0 0 0 0 0  
4.7379 1.1076 -0.1409 C 0 0 0 0 0 0 0 0 0 0 0 0  
4.5839 -0.2510 0.1054 C 0 0 0 0 0 0 0 0 0 0 0 0  
3.3141 -0.8119 0.1533 C 0 0 0 0 0 0 0 0 0 0 0 0  
5.7137 -0.9890 0.2924 O 0 0 0 0 0 0 0 0 0 0 0 0  
-3.8685 -2.0508 -0.5913 H 0 0 0 0 0 0 0 0 0 0 0 0  
-4.4155 2.6772 0.7354 H 0 0 0 0 0 0 0 0 0 0 0 0  
3.1968 -1.8723 0.3461 H 0 0 0 0 0 0 0 0 0 0 0 0  
-0.4360 0.9577 -0.2840 H 0 0 0 0 0 0 0 0 0 0 0 0  
0.8777 -1.7484 0.1938 H 0 0 0 0 0 0 0 0 0 0 0 0  
-6.1360 -1.0261 -0.5548 H 0 0 0 0 0 0 0 0 0 0 0 0  
-6.3989 1.3415 0.1127 H 0 0 0 0 0 0 0 0 0 0 0 0  
-2.1782 1.6673 0.6750 H 0 0 0 0 0 0 0 0 0 0 0 0  
1.4774 1.9752 -0.4562 H 0 0 0 0 0 0 0 0 0 0 0 0  
3.7312 2.9506 -0.5340 H 0 0 0 0 0 0 0 0 0 0 0 0  
5.7344 1.5235 -0.1748 H 0 0 0 0 0 0 0 0 0 0 0 0  
5.4835 -1.9082 0.4405 H 0 0 0 0 0 0 0 0 0 0 0 0

1 2 1 0 0 0 0  
1 7 4 0 0 0 0  
1 11 4 0 0 0 0  
2 3 2 0 0 0 0  
2 4 1 0 0 0 0  
4 5 2 0 0 0 0  
4 21 1 0 0 0 0  
5 6 1 0 0 0 0  
5 22 1 0 0 0 0  
6 12 4 0 0 0 0  
6 16 4 0 0 0 0  
7 8 4 0 0 0 0  
7 18 1 0 0 0 0

8 9 4 0 0 0 0  
8 23 1 0 0 0 0  
9 10 4 0 0 0 0  
9 24 1 0 0 0 0  
10 11 4 0 0 0 0  
10 19 1 0 0 0 0  
11 25 1 0 0 0 0  
12 13 4 0 0 0 0  
12 26 1 0 0 0 0  
13 14 4 0 0 0 0  
13 27 1 0 0 0 0  
14 15 4 0 0 0 0  
14 28 1 0 0 0 0  
15 16 4 0 0 0 0  
15 17 1 0 0 0 0  
16 20 1 0 0 0 0  
17 29 1 0 0 0 0

M END

\$\$\$\$

2\_A

28 29 0 0 0 0 0 0 0 0 V2000  
-2.8224 -0.2613 0.0253 C 0 0 0 0 0 0 0 0 0 0 0  
-1.4911 -0.9728 0.0096 C 0 0 0 0 0 0 0 0 0 0 0  
-1.4871 -2.1942 0.0551 O 0 0 0 0 0 0 0 0 0 0 0  
-0.2875 -0.1525 -0.0789 C 0 0 0 0 0 0 0 0 0 0 0  
0.9358 -0.7136 0.0301 C 0 0 0 0 0 0 0 0 0 0 0  
2.2261 -0.0512 -0.0478 C 0 0 0 0 0 0 0 0 0 0 0  
-3.9497 -0.9782 -0.3743 C 0 0 0 0 0 0 0 0 0 0 0  
-5.2018 -0.3817 -0.3705 C 0 0 0 0 0 0 0 0 0 0 0  
-5.3435 0.9365 0.0532 C 0 0 0 0 0 0 0 0 0 0 0  
-4.2280 1.6511 0.4716 C 0 0 0 0 0 0 0 0 0 0 0  
-2.9710 1.0574 0.4513 C 0 0 0 0 0 0 0 0 0 0 0

2.3497 1.3258 -0.3139 C 0 0 0 0 0 0 0 0 0 0 0 0  
3.6323 1.8622 -0.3608 C 0 0 0 0 0 0 0 0 0 0 0 0  
4.7638 1.0883 -0.1545 C 0 0 0 0 0 0 0 0 0 0 0 0  
4.7002 -0.3210 0.1206 C 0 0 0 0 0 0 0 0 0 0 0 0  
3.3575 -0.8382 0.1581 C 0 0 0 0 0 0 0 0 0 0 0 0  
5.7161 -1.0398 0.3111 O 0 0 0 0 0 0 0 0 0 0 0 0  
-3.8148 -2.0060 -0.6805 H 0 0 0 0 0 0 0 0 0 0 0 0  
-4.3351 2.6709 0.8159 H 0 0 0 0 0 0 0 0 0 0 0 0  
3.2454 -1.8973 0.3606 H 0 0 0 0 0 0 0 0 0 0 0 0  
-0.3966 0.9069 -0.2528 H 0 0 0 0 0 0 0 0 0 0 0 0  
0.9588 -1.7851 0.2032 H 0 0 0 0 0 0 0 0 0 0 0 0  
-6.0689 -0.9426 -0.6932 H 0 0 0 0 0 0 0 0 0 0 0 0  
-6.3201 1.4021 0.0621 H 0 0 0 0 0 0 0 0 0 0 0 0  
-2.1103 1.6155 0.7916 H 0 0 0 0 0 0 0 0 0 0 0 0  
1.4839 1.9480 -0.4868 H 0 0 0 0 0 0 0 0 0 0 0 0  
3.7533 2.9205 -0.5677 H 0 0 0 0 0 0 0 0 0 0 0 0  
5.7505 1.5334 -0.1976 H 0 0 0 0 0 0 0 0 0 0 0 0

1 2 1 0 0 0  
1 7 4 0 0 0  
1 11 4 0 0 0  
2 3 2 0 0 0  
2 4 1 0 0 0  
4 5 2 0 0 0  
4 21 1 0 0 0  
5 6 1 0 0 0  
5 22 1 0 0 0  
6 12 4 0 0 0  
6 16 4 0 0 0  
7 8 4 0 0 0  
7 18 1 0 0 0  
8 9 4 0 0 0  
8 23 1 0 0 0  
9 10 4 0 0 0  
9 24 1 0 0 0

10 11 4 0 0 0 0  
10 19 1 0 0 0 0  
11 25 1 0 0 0 0  
12 13 4 0 0 0 0  
12 26 1 0 0 0 0  
13 14 4 0 0 0 0  
13 27 1 0 0 0 0  
14 15 4 0 0 0 0  
14 28 1 0 0 0 0  
15 16 4 0 0 0 0  
15 17 1 0 0 0 0  
16 20 1 0 0 0 0

M END

\$\$\$\$

2\_NR

28 29 0 0 0 0 0 0 0 0 0 V2000

-2.8341 -0.2526 0.0098 C 0 0 0 0 0 0 0 0 0 0 0 0  
-1.5167 -0.9575 -0.0420 C 0 0 0 0 0 0 0 0 0 0 0 0  
-1.4680 -2.1700 -0.0461 O 0 0 0 0 0 0 0 0 0 0 0 0  
-0.2771 -0.1368 -0.1114 C 0 0 0 0 0 0 0 0 0 0 0 0  
0.9101 -0.7364 0.0155 C 0 0 0 0 0 0 0 0 0 0 0 0  
2.2297 -0.1026 -0.0460 C 0 0 0 0 0 0 0 0 0 0 0 0  
-3.9737 -0.9817 -0.3322 C 0 0 0 0 0 0 0 0 0 0 0 0  
-5.2228 -0.3837 -0.2923 C 0 0 0 0 0 0 0 0 0 0 0 0  
-5.3457 0.9438 0.1081 C 0 0 0 0 0 0 0 0 0 0 0 0  
-4.2176 1.6699 0.4677 C 0 0 0 0 0 0 0 0 0 0 0 0  
-2.9628 1.0765 0.4122 C 0 0 0 0 0 0 0 0 0 0 0 0  
2.4014 1.2706 -0.3480 C 0 0 0 0 0 0 0 0 0 0 0 0  
3.6722 1.8540 -0.3948 C 0 0 0 0 0 0 0 0 0 0 0 0  
4.7940 1.1015 -0.1504 C 0 0 0 0 0 0 0 0 0 0 0 0  
4.6788 -0.3076 0.1576 C 0 0 0 0 0 0 0 0 0 0 0 0  
3.3458 -0.8703 0.1950 C 0 0 0 0 0 0 0 0 0 0 0 0

5.6815 -1.0067 0.3825 O 0 0 0 0 0 0 0 0 0 0 0 0  
-3.8539 -2.0146 -0.6265 H 0 0 0 0 0 0 0 0 0 0 0 0  
-4.3144 2.6960 0.7937 H 0 0 0 0 0 0 0 0 0 0 0 0  
3.2666 -1.9244 0.4241 H 0 0 0 0 0 0 0 0 0 0 0 0  
-0.3695 0.9248 -0.2849 H 0 0 0 0 0 0 0 0 0 0 0 0  
0.9026 -1.8076 0.1855 H 0 0 0 0 0 0 0 0 0 0 0 0  
-6.1018 -0.9493 -0.5688 H 0 0 0 0 0 0 0 0 0 0 0 0  
-6.3210 1.4094 0.1444 H 0 0 0 0 0 0 0 0 0 0 0 0  
-2.0956 1.6473 0.7129 H 0 0 0 0 0 0 0 0 0 0 0 0  
1.5374 1.8843 -0.5551 H 0 0 0 0 0 0 0 0 0 0 0 0  
3.7626 2.9054 -0.6291 H 0 0 0 0 0 0 0 0 0 0 0 0  
5.7899 1.5194 -0.1793 H 0 0 0 0 0 0 0 0 0 0 0 0  
1 2 1 0 0 0 0  
1 7 4 0 0 0 0  
1 11 4 0 0 0 0  
2 3 2 0 0 0 0  
2 4 1 0 0 0 0  
4 5 2 0 0 0 0  
4 21 1 0 0 0 0  
5 6 1 0 0 0 0  
5 22 1 0 0 0 0  
6 12 4 0 0 0 0  
6 16 4 0 0 0 0  
7 8 4 0 0 0 0  
7 18 1 0 0 0 0  
8 9 4 0 0 0 0  
8 23 1 0 0 0 0  
9 10 4 0 0 0 0  
9 24 1 0 0 0 0  
10 11 4 0 0 0 0  
10 19 1 0 0 0 0  
11 25 1 0 0 0 0  
12 13 4 0 0 0 0  
12 26 1 0 0 0 0

13 14 4 0 0 0 0  
13 27 1 0 0 0 0  
14 15 4 0 0 0 0  
14 28 1 0 0 0 0  
15 16 4 0 0 0 0  
15 17 1 0 0 0 0  
16 20 1 0 0 0 0

M END

\$\$\$\$

2\_PR

29 30 0 0 0 0 0 0 0 0 0 V2000

-2.8741 -0.2529 -0.0156 C 0 0 0 0 0 0 0 0 0 0 0 0  
-1.5628 -0.9213 -0.1056 C 0 0 0 0 0 0 0 0 0 0 0 0  
-1.4305 -2.1234 -0.1732 O 0 0 0 0 0 0 0 0 0 0 0 0  
-0.3116 -0.0795 -0.1537 C 0 0 0 0 0 0 0 0 0 0 0 0  
0.8831 -0.7047 0.0032 C 0 0 0 0 0 0 0 0 0 0 0 0  
2.1705 -0.0847 -0.0426 C 0 0 0 0 0 0 0 0 0 0 0 0  
-4.0121 -1.0299 -0.2534 C 0 0 0 0 0 0 0 0 0 0 0 0  
-5.2687 -0.4585 -0.1656 C 0 0 0 0 0 0 0 0 0 0 0 0  
-5.3988 0.8859 0.1745 C 0 0 0 0 0 0 0 0 0 0 0 0  
-4.2728 1.6601 0.4273 C 0 0 0 0 0 0 0 0 0 0 0 0  
-3.0100 1.0957 0.3260 C 0 0 0 0 0 0 0 0 0 0 0 0  
2.3257 1.3169 -0.3412 C 0 0 0 0 0 0 0 0 0 0 0 0  
3.5786 1.8972 -0.3807 C 0 0 0 0 0 0 0 0 0 0 0 0  
4.6947 1.1196 -0.1320 C 0 0 0 0 0 0 0 0 0 0 0 0  
4.5540 -0.2754 0.1609 C 0 0 0 0 0 0 0 0 0 0 0 0  
5.6923 -0.9109 0.3762 O 0 0 0 0 0 0 0 0 0 0 0 0  
3.3033 -0.8638 0.2026 C 0 0 0 0 0 0 0 0 0 0 0 0  
-0.3947 0.9787 -0.3481 H 0 0 0 0 0 0 0 0 0 0 0 0  
0.8474 -1.7736 0.1820 H 0 0 0 0 0 0 0 0 0 0 0 0  
-3.8874 -2.0730 -0.5068 H 0 0 0 0 0 0 0 0 0 0 0 0  
-6.1483 -1.0557 -0.3582 H 0 0 0 0 0 0 0 0 0 0 0 0

-6.3820 1.3300 0.2456 H 0 0 0 0 0 0 0 0 0 0 0  
-4.3796 2.6995 0.7026 H 0 0 0 0 0 0 0 0 0 0 0  
-2.1483 1.7110 0.5444 H 0 0 0 0 0 0 0 0 0 0 0  
1.4544 1.9194 -0.5439 H 0 0 0 0 0 0 0 0 0 0 0  
3.6894 2.9473 -0.6061 H 0 0 0 0 0 0 0 0 0 0 0  
5.6956 1.5279 -0.1523 H 0 0 0 0 0 0 0 0 0 0 0  
5.5699 -1.8481 0.5692 H 0 0 0 0 0 0 0 0 0 0 0  
3.1951 -1.9176 0.4232 H 0 0 0 0 0 0 0 0 0 0 0

1 2 1 0 0 0 0  
1 7 4 0 0 0 0  
1 11 4 0 0 0 0  
2 3 2 0 0 0 0  
2 4 1 0 0 0 0  
4 5 2 0 0 0 0  
4 18 1 0 0 0 0  
5 6 1 0 0 0 0  
5 19 1 0 0 0 0  
6 12 4 0 0 0 0  
6 17 4 0 0 0 0  
7 8 4 0 0 0 0  
7 20 1 0 0 0 0  
8 9 4 0 0 0 0  
8 21 1 0 0 0 0  
9 10 4 0 0 0 0  
9 22 1 0 0 0 0  
10 11 4 0 0 0 0  
10 23 1 0 0 0 0  
11 24 1 0 0 0 0  
12 13 4 0 0 0 0  
12 25 1 0 0 0 0  
13 14 4 0 0 0 0  
13 26 1 0 0 0 0  
14 15 4 0 0 0 0  
14 27 1 0 0 0 0





```
5.4812 -1.9362 0.0025 H 0 0 0 0 0 0 0 0 0 0 0 0
3.1885 -1.9117 0.0001 H 0 0 0 0 0 0 0 0 0 0 0 0
-6.2539 1.3776 0.0004 H 0 0 0 0 0 0 0 0 0 0 0 0
1 2 1 0 0 0 0
1 7 4 0 0 0 0
1 11 4 0 0 0 0
2 3 2 0 0 0 0
2 4 1 0 0 0 0
4 5 2 0 0 0 0
4 18 1 0 0 0 0
5 6 1 0 0 0 0
5 19 1 0 0 0 0
6 12 4 0 0 0 0
6 17 4 0 0 0 0
7 8 4 0 0 0 0
8 9 4 0 0 0 0
8 20 1 0 0 0 0
9 10 4 0 0 0 0
9 27 1 0 0 0 0
10 11 4 0 0 0 0
11 21 1 0 0 0 0
12 13 4 0 0 0 0
12 22 1 0 0 0 0
13 14 4 0 0 0 0
13 23 1 0 0 0 0
14 15 4 0 0 0 0
14 24 1 0 0 0 0
15 16 1 0 0 0 0
15 17 4 0 0 0 0
16 25 1 0 0 0 0
17 26 1 0 0 0 0
M END
$$$
2a_A
```

26 27 0 0 0 0 0 0 0 0 V2000

2.8367 -0.2292 -0.0001 C 0 0 0 0 0 0 0 0 0 0 0 0  
1.5013 -0.9493 -0.0000 C 0 0 0 0 0 0 0 0 0 0 0 0  
1.5287 -2.1726 0.0000 O 0 0 0 0 0 0 0 0 0 0 0 0  
0.3110 -0.1250 -0.0000 C 0 0 0 0 0 0 0 0 0 0 0 0  
-0.9124 -0.7051 0.0001 C 0 0 0 0 0 0 0 0 0 0 0 0  
-2.2033 -0.0471 0.0001 C 0 0 0 0 0 0 0 0 0 0 0 0  
2.8771 1.0994 -0.0002 N 0 0 0 0 0 0 0 0 0 0 0 0  
4.0828 1.6572 -0.0002 C 0 0 0 0 0 0 0 0 0 0 0 0  
5.2445 0.8970 -0.0001 C 0 0 0 0 0 0 0 0 0 0 0 0  
5.2166 -0.4343 -0.0000 N 0 0 0 0 0 0 0 0 0 0 0 0  
4.0113 -0.9902 0.0000 C 0 0 0 0 0 0 0 0 0 0 0 0  
-2.3288 1.3555 0.0001 C 0 0 0 0 0 0 0 0 0 0 0 0  
-3.6132 1.8875 0.0001 C 0 0 0 0 0 0 0 0 0 0 0 0  
-4.7439 1.0846 0.0001 C 0 0 0 0 0 0 0 0 0 0 0 0  
-4.6791 -0.3515 0.0001 C 0 0 0 0 0 0 0 0 0 0 0 0  
-5.6957 -1.0934 0.0000 O 0 0 0 0 0 0 0 0 0 0 0 0  
-3.3347 -0.8633 0.0001 C 0 0 0 0 0 0 0 0 0 0 0 0  
0.4434 0.9445 -0.0001 H 0 0 0 0 0 0 0 0 0 0 0 0  
-0.9313 -1.7908 0.0001 H 0 0 0 0 0 0 0 0 0 0 0 0  
4.1274 2.7392 -0.0003 H 0 0 0 0 0 0 0 0 0 0 0 0  
3.9401 -2.0684 0.0001 H 0 0 0 0 0 0 0 0 0 0 0 0  
-1.4608 1.9981 0.0001 H 0 0 0 0 0 0 0 0 0 0 0 0  
-3.7376 2.9654 0.0001 H 0 0 0 0 0 0 0 0 0 0 0 0  
-5.7326 1.5274 0.0001 H 0 0 0 0 0 0 0 0 0 0 0 0  
-3.2189 -1.9412 0.0001 H 0 0 0 0 0 0 0 0 0 0 0 0  
6.2174 1.3723 -0.0001 H 0 0 0 0 0 0 0 0 0 0 0 0

1 2 1 0 0 0 0  
1 7 4 0 0 0 0  
1 11 4 0 0 0 0  
2 3 2 0 0 0 0  
2 4 1 0 0 0 0





9 10 4 0 0 0 0  
9 26 1 0 0 0 0  
10 11 4 0 0 0 0  
11 21 1 0 0 0 0  
12 13 4 0 0 0 0  
12 22 1 0 0 0 0  
13 14 4 0 0 0 0  
13 23 1 0 0 0 0  
14 15 4 0 0 0 0  
14 24 1 0 0 0 0  
15 16 1 0 0 0 0  
15 17 4 0 0 0 0  
17 25 1 0 0 0 0

M END

\$\$\$\$

2a\_PR

27 28 0 0 0 0 0 0 0 0 0 V2000

-2.8875 -0.2713 -0.0000 C 0 0 0 0 0 0 0 0 0 0 0 0  
-1.5843 -0.9886 0.0000 C 0 0 0 0 0 0 0 0 0 0 0 0  
-1.5013 -2.1929 0.0000 O 0 0 0 0 0 0 0 0 0 0 0 0  
-0.3446 -0.1405 -0.0000 C 0 0 0 0 0 0 0 0 0 0 0 0  
0.8561 -0.7653 0.0000 C 0 0 0 0 0 0 0 0 0 0 0 0  
2.1330 -0.1140 0.0000 C 0 0 0 0 0 0 0 0 0 0 0 0  
-2.8591 1.0624 -0.0001 N 0 0 0 0 0 0 0 0 0 0 0 0  
-4.0337 1.6725 -0.0001 C 0 0 0 0 0 0 0 0 0 0 0 0  
-5.2292 0.9491 -0.0001 C 0 0 0 0 0 0 0 0 0 0 0 0  
-5.2564 -0.3776 -0.0001 N 0 0 0 0 0 0 0 0 0 0 0 0  
-4.0795 -0.9925 -0.0000 C 0 0 0 0 0 0 0 0 0 0 0 0  
2.2410 1.3246 -0.0001 C 0 0 0 0 0 0 0 0 0 0 0 0  
3.4781 1.9449 -0.0001 C 0 0 0 0 0 0 0 0 0 0 0 0  
4.6221 1.1726 0.0000 C 0 0 0 0 0 0 0 0 0 0 0 0  
4.5264 -0.2581 0.0001 C 0 0 0 0 0 0 0 0 0 0 0 0

5.6857 -0.8863 0.0002 O 0 0 0 0 0 0 0 0 0 0 0 0  
3.2911 -0.8871 0.0001 C 0 0 0 0 0 0 0 0 0 0 0 0  
-0.4829 0.9295 -0.0000 H 0 0 0 0 0 0 0 0 0 0 0 0  
0.8465 -1.8500 0.0001 H 0 0 0 0 0 0 0 0 0 0 0 0  
-4.0385 2.7541 -0.0001 H 0 0 0 0 0 0 0 0 0 0 0 0  
-4.0676 -2.0740 -0.0000 H 0 0 0 0 0 0 0 0 0 0 0 0  
1.3444 1.9245 -0.0001 H 0 0 0 0 0 0 0 0 0 0 0 0  
3.5499 3.0222 -0.0001 H 0 0 0 0 0 0 0 0 0 0 0 0  
5.6120 1.6073 0.0000 H 0 0 0 0 0 0 0 0 0 0 0 0  
5.5955 -1.8472 0.0002 H 0 0 0 0 0 0 0 0 0 0 0 0  
3.2216 -1.9669 0.0002 H 0 0 0 0 0 0 0 0 0 0 0 0  
-6.1817 1.4627 -0.0002 H 0 0 0 0 0 0 0 0 0 0 0 0  
1 2 1 0 0 0 0  
1 7 4 0 0 0 0  
1 11 4 0 0 0 0  
2 3 2 0 0 0 0  
2 4 1 0 0 0 0  
4 5 2 0 0 0 0  
4 18 1 0 0 0 0  
5 6 1 0 0 0 0  
5 19 1 0 0 0 0  
6 12 4 0 0 0 0  
6 17 4 0 0 0 0  
7 8 4 0 0 0 0  
8 9 4 0 0 0 0  
8 20 1 0 0 0 0  
9 10 4 0 0 0 0  
9 27 1 0 0 0 0  
10 11 4 0 0 0 0  
11 21 1 0 0 0 0  
12 13 4 0 0 0 0  
12 22 1 0 0 0 0  
13 14 4 0 0 0 0  
13 23 1 0 0 0 0



-1.7918 -2.0998 -0.2801 H 0 0 0 0 0 0 0 0 0 0 0 0  
-4.1905 -2.6895 -0.2901 H 0 0 0 0 0 0 0 0 0 0 0 0  
-6.7066 -0.2969 0.1128 H 0 0 0 0 0 0 0 0 0 0 0 0  
-2.8220 2.0201 0.2976 H 0 0 0 0 0 0 0 0 0 0 0 0  
1.6022 -2.8844 0.0648 H 0 0 0 0 0 0 0 0 0 0 0 0  
5.1105 -2.9298 0.0573 H 0 0 0 0 0 0 0 0 0 0 0 0  
5.2935 -0.6554 0.0089 H 0 0 0 0 0 0 0 0 0 0 0 0  
3.5289 2.3972 -0.0505 H 0 0 0 0 0 0 0 0 0 0 0 0  
-5.1970 1.4223 0.2927 H 0 0 0 0 0 0 0 0 0 0 0 0

1 2 4 0 0 0 0  
1 6 4 0 0 0 0  
1 21 1 0 0 0 0  
2 3 1 0 0 0 0  
2 10 4 0 0 0 0  
3 4 1 0 0 0 0  
3 7 2 0 0 0 0  
4 5 4 0 0 0 0  
4 27 1 0 0 0 0  
5 6 4 0 0 0 0  
5 20 1 0 0 0 0  
6 29 1 0 0 0 0  
7 8 4 0 0 0 0  
8 9 4 0 0 0 0  
8 11 1 0 0 0 0  
9 10 4 0 0 0 0  
9 18 1 0 0 0 0  
10 19 1 0 0 0 0  
11 12 4 0 0 0 0  
11 16 4 0 0 0 0  
12 13 4 0 0 0 0  
12 26 1 0 0 0 0  
13 14 4 0 0 0 0  
13 31 1 0 0 0 0  
14 15 4 0 0 0 0



14 17 1 0 0 0 0  
15 16 4 0 0 0 0  
15 24 1 0 0 0 0  
16 23 1 0 0 0 0  
17 25 1 0 0 0 0  
18 22 1 0 0 0 0  
20 28 1 0 0 0 0  
21 30 1 0 0 0 0

M END

\$\$\$\$

apigenin\_4pA

30 32 0 0 0 0 0 0 0 0 V2000

2.5727 -1.3657 0.0000 C 0 0 0 0 0 0 0 0 0 0 0 0  
2.1466 -0.0042 -0.0000 C 0 0 0 0 0 0 0 0 0 0 0 0  
3.1714 0.9885 -0.0001 C 0 0 0 0 0 0 0 0 0 0 0 0  
4.4925 0.6527 -0.0001 C 0 0 0 0 0 0 0 0 0 0 0 0  
4.9523 -0.7223 -0.0000 C 0 0 0 0 0 0 0 0 0 0 0 0  
3.8894 -1.7115 0.0000 C 0 0 0 0 0 0 0 0 0 0 0 0  
0.7665 0.3119 -0.0000 C 0 0 0 0 0 0 0 0 0 0 0 0  
-0.0459 -0.8015 -0.0001 O 0 0 0 0 0 0 0 0 0 0 0 0  
-1.3933 -0.7404 -0.0000 C 0 0 0 0 0 0 0 0 0 0 0 0  
-2.0435 0.4891 0.0000 C 0 0 0 0 0 0 0 0 0 0 0 0  
-1.2550 1.6991 0.0000 C 0 0 0 0 0 0 0 0 0 0 0 0  
0.1437 1.5560 -0.0000 C 0 0 0 0 0 0 0 0 0 0 0 0  
-2.0910 -1.9430 -0.0000 C 0 0 0 0 0 0 0 0 0 0 0 0  
-3.4743 -1.8799 0.0000 C 0 0 0 0 0 0 0 0 0 0 0 0  
-4.1669 -0.6678 0.0001 C 0 0 0 0 0 0 0 0 0 0 0 0  
-3.4517 0.5203 0.0001 C 0 0 0 0 0 0 0 0 0 0 0 0  
-4.0946 1.6952 0.0001 O 0 0 0 0 0 0 0 0 0 0 0 0  
-4.1513 -3.0682 0.0000 O 0 0 0 0 0 0 0 0 0 0 0 0  
0.8531 2.7261 0.0000 O 0 0 0 0 0 0 0 0 0 0 0 0  
-1.7909 2.8508 0.0001 O 0 0 0 0 0 0 0 0 0 0 0 0

6.1565 -1.0330 -0.0000 O 0 0 0 0 0 0 0 0 0 0 0 0  
0.1664 3.4108 0.0001 H 0 0 0 0 0 0 0 0 0 0 0 0  
1.8227 -2.1438 0.0001 H 0 0 0 0 0 0 0 0 0 0 0 0  
4.1916 -2.7510 0.0001 H 0 0 0 0 0 0 0 0 0 0 0 0  
2.8901 2.0289 -0.0002 H 0 0 0 0 0 0 0 0 0 0 0 0  
-1.5731 -2.8891 -0.0000 H 0 0 0 0 0 0 0 0 0 0 0 0  
-5.0927 -2.8885 0.0002 H 0 0 0 0 0 0 0 0 0 0 0 0  
-5.2486 -0.6336 0.0001 H 0 0 0 0 0 0 0 0 0 0 0 0  
-3.3844 2.3952 0.0001 H 0 0 0 0 0 0 0 0 0 0 0 0  
5.2562 1.4198 -0.0002 H 0 0 0 0 0 0 0 0 0 0 0 0  
1 2 4 0 0 0 0  
1 6 4 0 0 0 0  
1 23 1 0 0 0 0  
2 3 4 0 0 0 0  
2 7 1 0 0 0 0  
3 4 4 0 0 0 0  
3 25 1 0 0 0 0  
4 5 4 0 0 0 0  
4 30 1 0 0 0 0  
5 6 4 0 0 0 0  
5 21 1 0 0 0 0  
6 24 1 0 0 0 0  
7 8 4 0 0 0 0  
7 12 4 0 0 0 0  
8 9 2 0 0 0 0  
9 10 1 0 0 0 0  
9 13 1 0 0 0 0  
10 11 4 0 0 0 0  
10 16 4 0 0 0 0  
11 12 4 0 0 0 0  
11 20 1 0 0 0 0  
12 19 1 0 0 0 0  
13 14 4 0 0 0 0  
13 26 1 0 0 0 0



6.1205 -1.0280 0.0005 O 0 0 0 0 0 0 0 0 0 0 0 0  
0.1798 3.4020 0.0001 H 0 0 0 0 0 0 0 0 0 0 0 0  
1.8006 -2.1416 -0.0000 H 0 0 0 0 0 0 0 0 0 0 0 0  
4.1904 -2.7616 0.0004 H 0 0 0 0 0 0 0 0 0 0 0 0  
2.8810 2.0380 -0.0004 H 0 0 0 0 0 0 0 0 0 0 0 0  
-1.5655 -2.8806 -0.0004 H 0 0 0 0 0 0 0 0 0 0 0 0  
-5.0707 -2.9147 0.0004 H 0 0 0 0 0 0 0 0 0 0 0 0  
-5.2477 -0.6346 0.0004 H 0 0 0 0 0 0 0 0 0 0 0 0  
-3.4805 2.4134 0.0005 H 0 0 0 0 0 0 0 0 0 0 0 0  
5.2639 1.4200 -0.0001 H 0 0 0 0 0 0 0 0 0 0 0 0  
1 2 4 0 0 0 0  
1 6 4 0 0 0 0  
1 23 1 0 0 0 0  
2 3 4 0 0 0 0  
2 7 1 0 0 0 0  
3 4 4 0 0 0 0  
3 25 1 0 0 0 0  
4 5 4 0 0 0 0  
4 30 1 0 0 0 0  
5 6 4 0 0 0 0  
5 21 1 0 0 0 0  
6 24 1 0 0 0 0  
7 8 4 0 0 0 0  
7 12 4 0 0 0 0  
8 9 2 0 0 0 0  
9 10 1 0 0 0 0  
9 13 1 0 0 0 0  
10 11 4 0 0 0 0  
10 16 4 0 0 0 0  
11 12 4 0 0 0 0  
11 20 1 0 0 0 0  
12 19 1 0 0 0 0  
13 14 4 0 0 0 0  
13 26 1 0 0 0 0

14 15 4 0 0 0 0  
14 18 1 0 0 0 0  
15 16 4 0 0 0 0  
15 28 1 0 0 0 0  
16 17 1 0 0 0 0  
17 29 1 0 0 0 0  
18 27 1 0 0 0 0  
19 22 1 0 0 0 0

M END

\$\$\$\$

apigenin\_PR

31 33 0 0 0 0 0 0 0 0 V2000

2.5432 -1.3605 0.0000 C 0 0 0 0 0 0 0 0 0 0 0 0  
2.1220 -0.0003 0.0000 C 0 0 0 0 0 0 0 0 0 0 0 0  
3.1136 1.0171 -0.0000 C 0 0 0 0 0 0 0 0 0 0 0 0  
4.4435 0.6920 -0.0000 C 0 0 0 0 0 0 0 0 0 0 0 0  
4.8340 -0.6588 -0.0000 C 0 0 0 0 0 0 0 0 0 0 0 0  
3.8676 -1.6846 0.0000 C 0 0 0 0 0 0 0 0 0 0 0 0  
0.7308 0.2846 0.0000 C 0 0 0 0 0 0 0 0 0 0 0 0  
-0.0673 -0.7931 0.0000 O 0 0 0 0 0 0 0 0 0 0 0 0  
-1.4395 -0.7339 0.0000 C 0 0 0 0 0 0 0 0 0 0 0 0  
-2.1036 0.5063 0.0000 C 0 0 0 0 0 0 0 0 0 0 0 0  
-1.3513 1.7043 -0.0000 C 0 0 0 0 0 0 0 0 0 0 0 0  
0.1185 1.5508 0.0000 C 0 0 0 0 0 0 0 0 0 0 0 0  
-2.1069 -1.9246 -0.0000 C 0 0 0 0 0 0 0 0 0 0 0 0  
-3.5151 -1.8824 -0.0000 C 0 0 0 0 0 0 0 0 0 0 0 0  
-4.2215 -0.6839 -0.0000 C 0 0 0 0 0 0 0 0 0 0 0 0  
-3.5264 0.5142 0.0000 C 0 0 0 0 0 0 0 0 0 0 0 0  
-4.2034 1.6503 0.0000 O 0 0 0 0 0 0 0 0 0 0 0 0  
-4.1216 -3.0699 -0.0000 O 0 0 0 0 0 0 0 0 0 0 0 0  
0.7808 2.6762 0.0000 O 0 0 0 0 0 0 0 0 0 0 0 0  
-1.7813 2.8612 -0.0000 O 0 0 0 0 0 0 0 0 0 0 0 0

6.1014 -1.0384 -0.0000 O 0 0 0 0 0 0 0 0 0 0 0 0  
0.1035 3.3906 -0.0000 H 0 0 0 0 0 0 0 0 0 0 0 0  
1.8019 -2.1439 0.0000 H 0 0 0 0 0 0 0 0 0 0 0 0  
4.2047 -2.7108 0.0000 H 0 0 0 0 0 0 0 0 0 0 0 0  
6.7105 -0.2918 -0.0000 H 0 0 0 0 0 0 0 0 0 0 0 0  
2.8324 2.0558 -0.0000 H 0 0 0 0 0 0 0 0 0 0 0 0  
-1.5913 -2.8722 -0.0000 H 0 0 0 0 0 0 0 0 0 0 0 0  
-5.0799 -2.9829 -0.0000 H 0 0 0 0 0 0 0 0 0 0 0 0  
-5.3025 -0.6616 -0.0000 H 0 0 0 0 0 0 0 0 0 0 0 0  
-3.5967 2.4129 -0.0000 H 0 0 0 0 0 0 0 0 0 0 0 0  
5.1944 1.4712 -0.0000 H 0 0 0 0 0 0 0 0 0 0 0 0  
1 2 4 0 0 0 0  
1 6 4 0 0 0 0  
1 23 1 0 0 0 0  
2 3 4 0 0 0 0  
2 7 1 0 0 0 0  
3 4 4 0 0 0 0  
3 26 1 0 0 0 0  
4 5 4 0 0 0 0  
4 31 1 0 0 0 0  
5 6 4 0 0 0 0  
5 21 1 0 0 0 0  
6 24 1 0 0 0 0  
7 8 4 0 0 0 0  
7 12 4 0 0 0 0  
8 9 2 0 0 0 0  
9 10 1 0 0 0 0  
9 13 1 0 0 0 0  
10 11 4 0 0 0 0  
10 16 4 0 0 0 0  
11 12 4 0 0 0 0  
11 20 1 0 0 0 0  
12 19 1 0 0 0 0  
13 14 4 0 0 0 0

13 27 1 0 0 0 0  
14 15 4 0 0 0 0  
14 18 1 0 0 0 0  
15 16 4 0 0 0 0  
15 29 1 0 0 0 0  
16 17 1 0 0 0 0  
17 30 1 0 0 0 0  
18 28 1 0 0 0 0  
19 22 1 0 0 0 0  
21 25 1 0 0 0 0

M END

\$\$\$\$

quercetin

32 34 0 0 0 0 0 0 0 0 0 V2000

-2.8666 0.7607 0.0663 C 0 0 0 0 0 0 0 0 0 0 0 0  
-1.8358 -0.1880 -0.0138 C 0 0 0 0 0 0 0 0 0 0 0 0  
-2.1715 -1.5428 -0.0986 C 0 0 0 0 0 0 0 0 0 0 0 0  
-3.4972 -1.9462 -0.1072 C 0 0 0 0 0 0 0 0 0 0 0 0  
-4.5123 -1.0073 -0.0279 C 0 0 0 0 0 0 0 0 0 0 0 0  
-4.1813 0.3469 0.0601 C 0 0 0 0 0 0 0 0 0 0 0 0  
-0.4274 0.2098 -0.0074 C 0 0 0 0 0 0 0 0 0 0 0 0  
0.0874 1.4659 -0.0255 C 0 0 0 0 0 0 0 0 0 0 0 0  
1.5173 1.6932 -0.0253 C 0 0 0 0 0 0 0 0 0 0 0 0  
2.3525 0.5297 -0.0064 C 0 0 0 0 0 0 0 0 0 0 0 0  
1.7597 -0.7368 0.0133 C 0 0 0 0 0 0 0 0 0 0 0 0  
0.4135 -0.8651 0.0121 O 0 0 0 0 0 0 0 0 0 0 0 0  
2.5071 -1.9011 0.0355 C 0 0 0 0 0 0 0 0 0 0 0 0  
3.8896 -1.7757 0.0379 C 0 0 0 0 0 0 0 0 0 0 0 0  
4.5267 -0.5318 0.0185 C 0 0 0 0 0 0 0 0 0 0 0 0  
3.7650 0.6210 -0.0043 C 0 0 0 0 0 0 0 0 0 0 0 0  
1.9399 2.8644 -0.0461 O 0 0 0 0 0 0 0 0 0 0 0 0  
-0.6671 2.5903 -0.0492 O 0 0 0 0 0 0 0 0 0 0 0 0





11 12 2 0 0 0 0  
11 13 1 0 0 0 0  
13 14 4 0 0 0 0  
13 29 1 0 0 0 0  
14 15 4 0 0 0 0  
14 20 1 0 0 0 0  
15 16 4 0 0 0 0  
15 31 1 0 0 0 0  
16 19 1 0 0 0 0  
18 23 1 0 0 0 0  
19 32 1 0 0 0 0  
20 30 1 0 0 0 0  
21 26 1 0 0 0 0  
22 27 1 0 0 0 0

M END

\$\$\$\$

q\_4pA

31 33 0 0 0 0 0 0 0 0 V2000

2.9221 0.7794 -0.0006 C 0 0 0 0 0 0 0 0 0 0 0 0  
1.8571 -0.1736 0.0002 C 0 0 0 0 0 0 0 0 0 0 0 0  
2.2004 -1.5472 0.0009 C 0 0 0 0 0 0 0 0 0 0 0 0  
3.5059 -1.9717 0.0010 C 0 0 0 0 0 0 0 0 0 0 0 0  
4.5912 -1.0451 0.0003 C 0 0 0 0 0 0 0 0 0 0 0 0  
4.2134 0.3547 -0.0005 C 0 0 0 0 0 0 0 0 0 0 0 0  
0.4867 0.2104 0.0000 C 0 0 0 0 0 0 0 0 0 0 0 0  
-0.0696 1.4815 0.0002 C 0 0 0 0 0 0 0 0 0 0 0 0  
-1.4645 1.6931 0.0000 C 0 0 0 0 0 0 0 0 0 0 0 0  
-2.3102 0.5239 0.0002 C 0 0 0 0 0 0 0 0 0 0 0 0  
-1.7193 -0.7357 -0.0002 C 0 0 0 0 0 0 0 0 0 0 0 0  
-0.3781 -0.8612 -0.0003 O 0 0 0 0 0 0 0 0 0 0 0 0  
-2.4734 -1.9040 -0.0004 C 0 0 0 0 0 0 0 0 0 0 0 0  
-3.8521 -1.7751 -0.0004 C 0 0 0 0 0 0 0 0 0 0 0 0

-4.4861 -0.5309 -0.0002 C 0 0 0 0 0 0 0 0 0 0 0 0  
-3.7159 0.6218 0.0002 C 0 0 0 0 0 0 0 0 0 0 0 0  
-1.9403 2.8681 0.0000 O 0 0 0 0 0 0 0 0 0 0 0 0  
0.6937 2.6136 0.0005 O 0 0 0 0 0 0 0 0 0 0 0 0  
-4.3036 1.8247 0.0005 O 0 0 0 0 0 0 0 0 0 0 0 0  
-4.5845 -2.9289 -0.0007 O 0 0 0 0 0 0 0 0 0 0 0 0  
5.8148 -1.3350 0.0002 O 0 0 0 0 0 0 0 0 0 0 0 0  
5.2701 1.2151 -0.0012 O 0 0 0 0 0 0 0 0 0 0 0 0  
0.0448 3.3335 0.0002 H 0 0 0 0 0 0 0 0 0 0 0 0  
1.4103 -2.2829 0.0015 H 0 0 0 0 0 0 0 0 0 0 0 0  
3.7479 -3.0262 0.0016 H 0 0 0 0 0 0 0 0 0 0 0 0  
6.0333 0.6089 -0.0009 H 0 0 0 0 0 0 0 0 0 0 0 0  
2.7182 1.8369 -0.0012 H 0 0 0 0 0 0 0 0 0 0 0 0  
-2.0009 -2.8732 -0.0005 H 0 0 0 0 0 0 0 0 0 0 0 0  
-5.5166 -2.7054 0.0014 H 0 0 0 0 0 0 0 0 0 0 0 0  
-5.5649 -0.4452 -0.0004 H 0 0 0 0 0 0 0 0 0 0 0 0  
-3.5647 2.4921 0.0007 H 0 0 0 0 0 0 0 0 0 0 0 0  
1 2 4 0 0 0 0  
1 6 4 0 0 0 0  
1 2 7 1 0 0 0 0  
2 3 4 0 0 0 0  
2 7 1 0 0 0 0  
3 4 4 0 0 0 0  
3 2 4 1 0 0 0 0  
4 5 4 0 0 0 0  
4 2 5 1 0 0 0 0  
5 6 4 0 0 0 0  
5 2 1 1 0 0 0 0  
6 2 2 1 0 0 0 0  
7 8 4 0 0 0 0  
7 1 2 4 0 0 0 0  
8 9 4 0 0 0 0  
8 1 8 1 0 0 0 0  
9 1 0 4 0 0 0 0



-2.4550 -1.8970 0.0000 C 0 0 0 0 0 0 0 0 0 0 0 0  
-3.8392 -1.7759 -0.0001 C 0 0 0 0 0 0 0 0 0 0 0 0  
-4.4808 -0.5342 -0.0001 C 0 0 0 0 0 0 0 0 0 0 0 0  
-3.7232 0.6208 0.0000 C 0 0 0 0 0 0 0 0 0 0 0 0  
-1.8979 2.8694 0.0000 O 0 0 0 0 0 0 0 0 0 0 0 0  
0.6969 2.5987 -0.0001 O 0 0 0 0 0 0 0 0 0 0 0 0  
-4.3341 1.8065 -0.0000 O 0 0 0 0 0 0 0 0 0 0 0 0  
-4.5456 -2.9270 -0.0002 O 0 0 0 0 0 0 0 0 0 0 0 0  
5.7811 -1.3431 -0.0001 O 0 0 0 0 0 0 0 0 0 0 0 0  
5.2267 1.2279 -0.0002 O 0 0 0 0 0 0 0 0 0 0 0 0  
0.0550 3.3302 -0.0001 H 0 0 0 0 0 0 0 0 0 0 0 0  
1.3987 -2.2790 0.0003 H 0 0 0 0 0 0 0 0 0 0 0 0  
3.7427 -3.0435 0.0002 H 0 0 0 0 0 0 0 0 0 0 0 0  
6.0356 0.6860 -0.0002 H 0 0 0 0 0 0 0 0 0 0 0 0  
2.6954 1.8479 -0.0001 H 0 0 0 0 0 0 0 0 0 0 0 0  
-1.9834 -2.8665 -0.0000 H 0 0 0 0 0 0 0 0 0 0 0 0  
-5.4873 -2.7407 -0.0006 H 0 0 0 0 0 0 0 0 0 0 0 0  
-5.5593 -0.4551 -0.0002 H 0 0 0 0 0 0 0 0 0 0 0 0  
-3.6519 2.5080 -0.0001 H 0 0 0 0 0 0 0 0 0 0 0 0  
1 2 4 0 0 0 0  
1 6 4 0 0 0 0  
1 27 1 0 0 0 0  
2 3 4 0 0 0 0  
2 7 1 0 0 0 0  
3 4 4 0 0 0 0  
3 24 1 0 0 0 0  
4 5 4 0 0 0 0  
4 25 1 0 0 0 0  
5 6 4 0 0 0 0  
5 21 1 0 0 0 0  
6 22 1 0 0 0 0  
7 8 4 0 0 0 0  
7 12 4 0 0 0 0  
8 9 4 0 0 0 0



-1.8361 -0.1770 0.0000 C 0 0 0 0 0 0 0 0 0 0 0 0  
-2.8729 0.7927 0.0001 C 0 0 0 0 0 0 0 0 0 0 0 0  
-4.1753 0.3847 0.0001 C 0 0 0 0 0 0 0 0 0 0 0 0  
-4.5019 -1.0016 -0.0000 C 0 0 0 0 0 0 0 0 0 0 0 0  
-3.4834 -1.9644 -0.0001 C 0 0 0 0 0 0 0 0 0 0 0 0  
-2.1784 -1.5611 -0.0001 C 0 0 0 0 0 0 0 0 0 0 0 0  
-5.7583 -1.3834 -0.0000 O 0 0 0 0 0 0 0 0 0 0 0 0  
-5.2622 1.1844 0.0001 O 0 0 0 0 0 0 0 0 0 0 0 0  
-0.6375 2.5609 -0.0000 O 0 0 0 0 0 0 0 0 0 0 0 0  
1.9082 2.8749 -0.0002 O 0 0 0 0 0 0 0 0 0 0 0 0  
4.5634 -2.9225 -0.0000 O 0 0 0 0 0 0 0 0 0 0 0 0  
4.3911 1.7959 -0.0001 O 0 0 0 0 0 0 0 0 0 0 0 0  
0.0092 3.3031 -0.0000 H 0 0 0 0 0 0 0 0 0 0 0 0  
-1.3912 -2.2971 -0.0001 H 0 0 0 0 0 0 0 0 0 0 0 0  
-3.7615 -3.0082 -0.0002 H 0 0 0 0 0 0 0 0 0 0 0 0  
-6.3508 -0.6164 0.0001 H 0 0 0 0 0 0 0 0 0 0 0 0  
-5.0428 2.1207 0.0006 H 0 0 0 0 0 0 0 0 0 0 0 0  
-2.6475 1.8463 0.0002 H 0 0 0 0 0 0 0 0 0 0 0 0  
2.0254 -2.8615 0.0001 H 0 0 0 0 0 0 0 0 0 0 0 0  
5.5150 -2.7809 -0.0001 H 0 0 0 0 0 0 0 0 0 0 0 0  
5.6116 -0.4552 -0.0001 H 0 0 0 0 0 0 0 0 0 0 0 0  
3.7428 2.5229 -0.0000 H 0 0 0 0 0 0 0 0 0 0 0 0  
1 2 4 0 0 0 0  
1 6 4 0 0 0 0  
1 2 2 1 0 0 0 0  
2 3 1 0 0 0 0  
2 1 0 4 0 0 0 0  
3 4 1 0 0 0 0  
3 7 2 0 0 0 0  
4 5 4 0 0 0 0  
4 2 9 1 0 0 0 0  
5 6 4 0 0 0 0  
5 2 1 1 0 0 0 0  
6 3 1 1 0 0 0 0



2.8768 1.2804 -0.4913 O 0 0 0 0 0 0 0 0 0 0 0 0  
2.8063 -1.6154 -0.4151 O 0 0 0 0 0 0 0 0 0 0 0 0  
-1.4489 -0.4804 -0.1654 C 0 0 0 0 0 0 0 0 0 0 0 0  
-2.3698 0.7290 -0.1183 C 0 0 0 0 0 0 0 0 0 0 0 0  
-2.1103 -1.6053 0.3688 O 0 0 0 0 0 0 0 0 0 0 0 0  
-3.5570 0.3093 -0.7872 O 0 0 0 0 0 0 0 0 0 0 0 0  
-0.4510 -0.3482 1.7229 H 0 0 0 0 0 0 0 0 0 0 0 0  
0.8248 2.8000 0.3538 H 0 0 0 0 0 0 0 0 0 0 0 0  
3.5924 0.6773 -0.7302 H 0 0 0 0 0 0 0 0 0 0 0 0  
-1.1505 -0.6631 -1.2038 H 0 0 0 0 0 0 0 0 0 0 0 0  
-1.9179 1.5810 -0.6239 H 0 0 0 0 0 0 0 0 0 0 0 0  
-2.5835 0.9892 0.9221 H 0 0 0 0 0 0 0 0 0 0 0 0  
-2.9833 -1.6288 -0.0354 H 0 0 0 0 0 0 0 0 0 0 0 0  
-4.2439 0.9660 -0.6715 H 0 0 0 0 0 0 0 0 0 0 0 0  
1 2 1 0 0 0 0  
1 5 1 0 0 0 0  
1 9 1 0 0 0 0  
1 13 1 0 0 0 0  
2 3 2 0 0 0 0  
2 6 1 0 0 0 0  
3 4 1 0 0 0 0  
3 7 1 0 0 0 0  
4 5 1 0 0 0 0  
4 8 1 0 0 0 0  
6 14 1 0 0 0 0  
7 15 1 0 0 0 0  
9 10 1 0 0 0 0  
9 11 1 0 0 0 0  
9 16 1 0 0 0 0  
10 12 1 0 0 0 0  
10 17 1 0 0 0 0  
10 18 1 0 0 0 0  
11 19 1 0 0 0 0  
12 20 1 0 0 0 0



M END

\$\$\$\$

VitC\_A

19 19 0 0 1 0 0 0 0 0999 V2000

-0.2004 -0.1529 0.6766 C 0 0 3 0 0 0 0 0 0 0 0 0 0 0  
0.6317 1.0833 0.3045 C 0 0 0 0 0 0 0 0 0 0 0 0 0 0  
1.8537 0.5599 -0.0959 C 0 0 0 0 0 0 0 0 0 0 0 0 0 0  
1.8645 -0.8468 -0.0056 C 0 0 0 0 0 0 0 0 0 0 0 0 0 0  
0.6363 -1.3027 0.4703 O 0 0 0 0 0 0 0 0 0 0 0 0 0 0  
0.1651 2.2318 0.3879 O 0 5 0 0 0 0 0 0 0 0 0 0 0 0  
2.9716 1.2353 -0.5428 O 0 0 0 0 0 0 0 0 0 0 0 0 0 0  
2.7608 -1.6305 -0.2786 O 0 0 0 0 0 0 0 0 0 0 0 0 0 0  
-1.4275 -0.3281 -0.1979 C 0 0 3 0 0 0 0 0 0 0 0 0 0 0  
-2.5177 0.6803 0.0906 C 0 0 0 0 0 0 0 0 0 0 0 0 0 0  
-2.0073 -1.6180 0.0397 O 0 0 0 0 0 0 0 0 0 0 0 0 0 0  
-3.6796 0.3784 -0.6772 O 0 0 0 0 0 0 0 0 0 0 0 0 0 0  
-0.4881 -0.1242 1.7297 H 0 0 0 0 0 0 0 0 0 0 0 0 0 0  
3.6119 0.5422 -0.7355 H 0 0 0 0 0 0 0 0 0 0 0 0 0 0  
-1.1231 -0.2578 -1.2474 H 0 0 0 0 0 0 0 0 0 0 0 0 0 0  
-2.1769 1.6781 -0.1665 H 0 0 0 0 0 0 0 0 0 0 0 0 0 0  
-2.7527 0.6483 1.1598 H 0 0 0 0 0 0 0 0 0 0 0 0 0 0  
-1.2755 -2.2430 0.0354 H 0 0 0 0 0 0 0 0 0 0 0 0 0 0  
-3.7962 -0.5730 -0.6036 H 0 0 0 0 0 0 0 0 0 0 0 0 0 0

1 13 1 0 0 0 0

1 9 1 0 0 0 0

1 2 1 0 0 0 0

1 5 1 0 0 0 0

2 3 2 0 0 0 0

2 6 1 0 0 0 0

3 4 1 0 0 0 0

3 7 1 0 0 0 0

4 5 1 0 0 0 0

4 8 2 0 0 0 0  
7 14 1 0 0 0 0  
9 15 1 0 0 0 0  
9 10 1 0 0 0 0  
9 11 1 0 0 0 0  
10 16 1 0 0 0 0  
10 17 1 0 0 0 0  
10 12 1 0 0 0 0  
11 18 1 0 0 0 0  
12 19 1 0 0 0 0  
M CHG 1 6 -1  
M END  
\$\$\$\$  
VitC\_NR

19 19 0 0 0 0 0 0 0 0 0 V2000  
-0.1915 -0.2540 0.6592 C 0 0 0 0 0 0 0 0 0 0 0 0  
0.5858 1.0316 0.3610 C 0 0 0 0 0 0 0 0 0 0 0 0  
1.8636 0.5800 -0.0936 C 0 0 0 0 0 0 0 0 0 0 0 0  
1.9019 -0.8826 -0.0628 C 0 0 0 0 0 0 0 0 0 0 0 0  
0.7230 -1.3436 0.3808 O 0 0 0 0 0 0 0 0 0 0 0 0  
0.1696 2.1641 0.5065 O 0 0 0 0 0 0 0 0 0 0 0 0  
2.8953 1.2885 -0.4764 O 0 0 0 0 0 0 0 0 0 0 0 0  
2.8476 -1.5497 -0.3808 O 0 0 0 0 0 0 0 0 0 0 0 0  
-1.4431 -0.4401 -0.1793 C 0 0 0 0 0 0 0 0 0 0 0 0  
-2.4131 0.7246 -0.0455 C 0 0 0 0 0 0 0 0 0 0 0 0  
-2.0493 -1.6264 0.2811 O 0 0 0 0 0 0 0 0 0 0 0 0  
-3.5824 0.2951 -0.7400 O 0 0 0 0 0 0 0 0 0 0 0 0  
-0.4527 -0.3087 1.7157 H 0 0 0 0 0 0 0 0 0 0 0 0  
3.6083 0.6709 -0.7102 H 0 0 0 0 0 0 0 0 0 0 0 0  
-1.1512 -0.5426 -1.2314 H 0 0 0 0 0 0 0 0 0 0 0 0  
-2.0023 1.6306 -0.4866 H 0 0 0 0 0 0 0 0 0 0 0 0  
-2.6323 0.8991 1.0111 H 0 0 0 0 0 0 0 0 0 0 0 0

```
-2.9303 -1.6512 -0.1064 H 0 0 0 0 0 0 0 0 0 0 0 0
-4.2924 0.9209 -0.5955 H 0 0 0 0 0 0 0 0 0 0 0 0
1 2 1 0 0 0 0
1 5 1 0 0 0 0
1 9 1 0 0 0 0
1 13 1 0 0 0 0
2 3 1 0 0 0 0
2 6 1 0 0 0 0
3 4 1 0 0 0 0
3 7 1 0 0 0 0
4 5 1 0 0 0 0
4 8 1 0 0 0 0
7 14 1 0 0 0 0
9 10 1 0 0 0 0
9 11 1 0 0 0 0
9 15 1 0 0 0 0
10 12 1 0 0 0 0
10 16 1 0 0 0 0
10 17 1 0 0 0 0
11 18 1 0 0 0 0
12 19 1 0 0 0 0
M END
$$$$
VitC_PR
```

```
20 20 0 0 0 0 0 0 0 0 V2000
-0.1984 -0.2366 0.6604 C 0 0 0 0 0 0 0 0 0 0 0 0
0.6267 0.9676 0.3313 C 0 0 0 0 0 0 0 0 0 0 0 0
1.8751 0.5211 -0.1190 C 0 0 0 0 0 0 0 0 0 0 0 0
1.8748 -0.9733 -0.0510 C 0 0 0 0 0 0 0 0 0 0 0 0
0.6886 -1.3532 0.4231 O 0 0 0 0 0 0 0 0 0 0 0 0
0.1987 2.1709 0.4814 O 0 0 0 0 0 0 0 0 0 0 0 0
2.8674 1.2389 -0.5049 O 0 0 0 0 0 0 0 0 0 0 0 0
```

```
2.8033 -1.6391 -0.3678 O 0 0 0 0 0 0 0 0 0 0 0 0
-1.4635 -0.4242 -0.1882 C 0 0 0 0 0 0 0 0 0 0 0 0
-2.4715 0.7095 -0.0281 C 0 0 0 0 0 0 0 0 0 0 0 0
-1.9954 -1.6258 0.2812 O 0 0 0 0 0 0 0 0 0 0 0 0
-3.5949 0.2419 -0.7458 O 0 0 0 0 0 0 0 0 0 0 0 0
-0.4740 -0.2462 1.7178 H 0 0 0 0 0 0 0 0 0 0 0 0
0.8456 2.8560 0.2412 H 0 0 0 0 0 0 0 0 0 0 0 0
3.6277 0.6763 -0.7601 H 0 0 0 0 0 0 0 0 0 0 0 0
-1.1718 -0.5025 -1.2431 H 0 0 0 0 0 0 0 0 0 0 0 0
-2.0956 1.6435 -0.4506 H 0 0 0 0 0 0 0 0 0 0 0 0
-2.7036 0.8473 1.0322 H 0 0 0 0 0 0 0 0 0 0 0 0
-2.8699 -1.7313 -0.1135 H 0 0 0 0 0 0 0 0 0 0 0 0
-4.3583 0.8025 -0.5944 H 0 0 0 0 0 0 0 0 0 0 0 0
1 2 1 0 0 0 0
1 5 1 0 0 0 0
1 9 1 0 0 0 0
1 13 1 0 0 0 0
2 3 2 0 0 0 0
2 6 1 0 0 0 0
3 4 1 0 0 0 0
3 7 1 0 0 0 0
4 5 1 0 0 0 0
4 8 1 0 0 0 0
6 14 1 0 0 0 0
7 15 1 0 0 0 0
9 10 1 0 0 0 0
9 11 1 0 0 0 0
9 16 1 0 0 0 0
10 12 1 0 0 0 0
10 17 1 0 0 0 0
10 18 1 0 0 0 0
11 19 1 0 0 0 0
12 20 1 0 0 0 0
M END
```

\$\$\$
